# Supplementary material
Source: PubMed Central journal article supplement (PMC3369730)
Supplement: cn100090g_si_001.pdf [file cn100090g_si_001.pdf]

## Supplementary Information

### Cysteine Thioesters as Myelin Proteolipid Protein Analogues to Examine the Role of Butyrylcholinesterase in Myelin Decompaction

Ian R. Pottie<sup>a</sup>, Emma A. Higgins<sup>a</sup>, Rachele A. Blackman<sup>a,c</sup>, Ian R. Macdonald<sup>c</sup>, Earl Martin<sup>a</sup>, Sultan Darvesh<sup>a,b,c\*</sup>

<sup>a</sup>Department of Chemistry, Mount Saint Vincent University, Halifax, Nova Scotia, Canada

<sup>b</sup>Department of Medicine (Neurology and Geriatric Medicine), Dalhousie University, Halifax, Nova Scotia, Canada

<sup>c</sup>Department of Anatomy and Neurobiology, Dalhousie University, Halifax, Nova Scotia, Canada

#### Table of Contents

|                                                                 |        |
|-----------------------------------------------------------------|--------|
| A. Yields and purity of synthesized analogues                   | S2     |
| B. <sup>1</sup> H NMR, <sup>13</sup> C NMR, HRMS & HPLC spectra | S3-S34 |

A. **Table S1.** Yields and purity of the synthesized compounds.

| <b>Comp. #</b> | <b>Name</b>                                        | <b>% Yield</b> | <b>% Purity<sup>a</sup></b> |
|----------------|----------------------------------------------------|----------------|-----------------------------|
| <b>2</b>       | Methyl 2-acetamido-3-mercaptopropanoate            | 74             | 98.04                       |
| <b>3</b>       | Methyl 2-acetamido-3-(acetylthio)propanoate        | 45             | 99.10                       |
| <b>4</b>       | Methyl 2-acetamido-3-(butyrylthio)propanoate       | 46             | 98.89                       |
| <b>5</b>       | Methyl 2-acetamido-3-(octanoylthio)propanoate      | 70             | 98.34                       |
| <b>6</b>       | Methyl 2-acetamido-3-(decanoylthio)propanoate      | 43             | 98.78                       |
| <b>7</b>       | Methyl 2-acetamido-3-(dodecanoylthio)propanoate    | 81             | 98.82                       |
| <b>8</b>       | Methyl 2-acetamido-3-(tetradecanoylthio)propanoate | 43             | 99.43                       |
| <b>9</b>       | Methyl 2-acetamido-3-(palmitoylthio)propanoate     | 61             | 98.88                       |

<sup>a</sup> The experimental procedure to determine purity of each compound is stated in the legend for the spectrum for each compound.

B.  $^1\text{H}$  NMR,  $^{13}\text{C}$  NMR, HRMS & HPLC for each compound

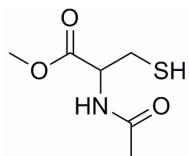

Methyl 2-acetamido-3-mercaptopropanoate **2**  
(500.1 MHz,  $\text{CHCl}_3-d_3$ )

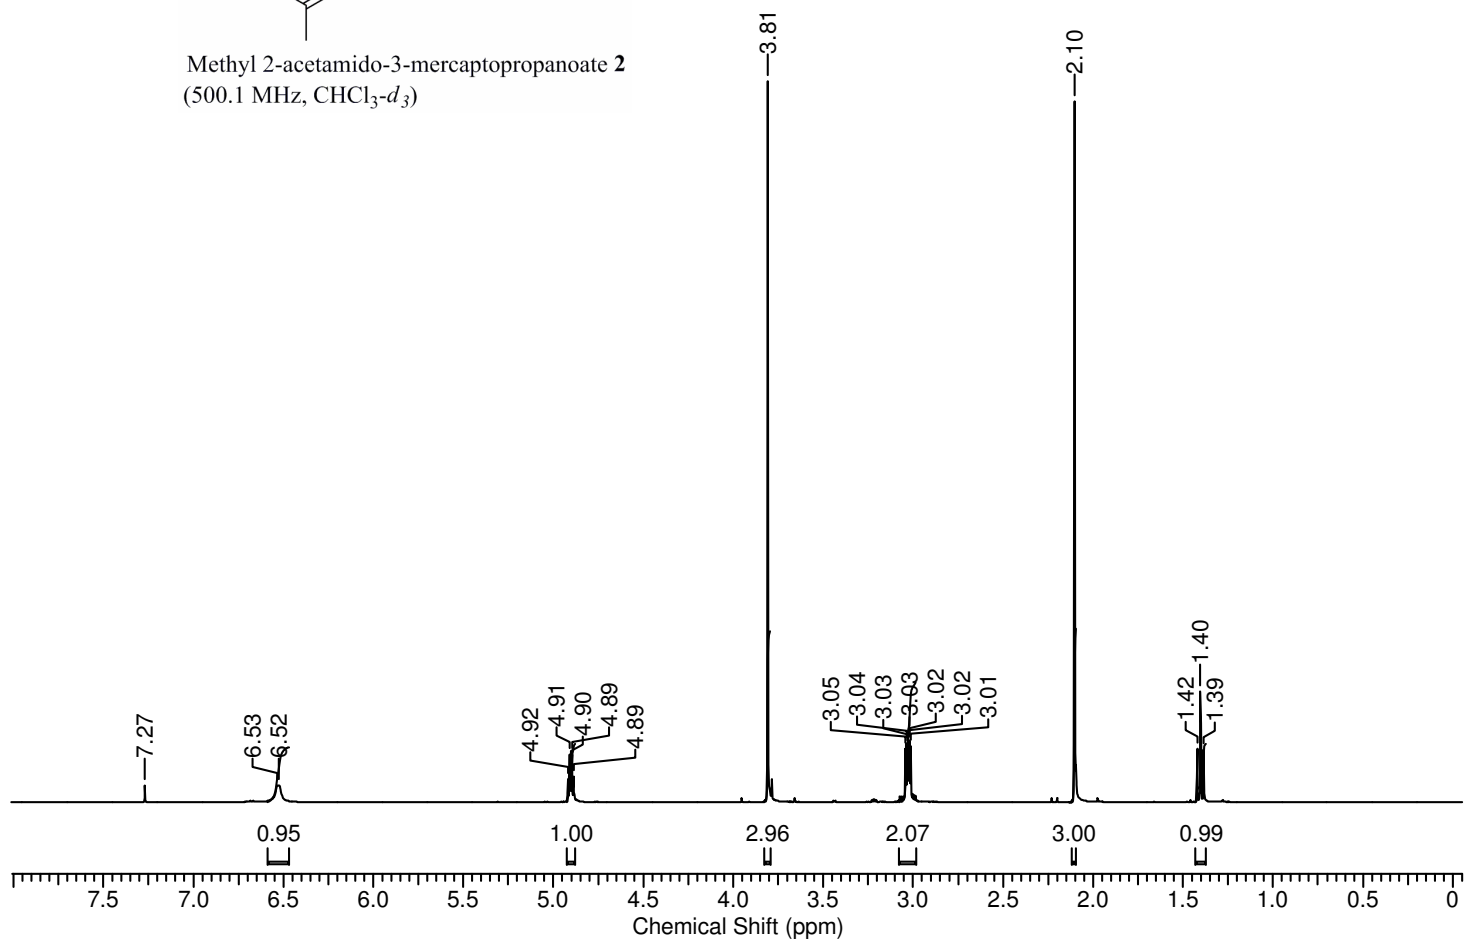

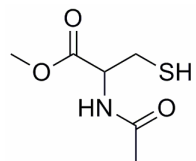

Methyl 2-acetamido-3-mercaptopropanoate **2**  
(125.8 MHz,  $\text{CHCl}_3-d_3$ )

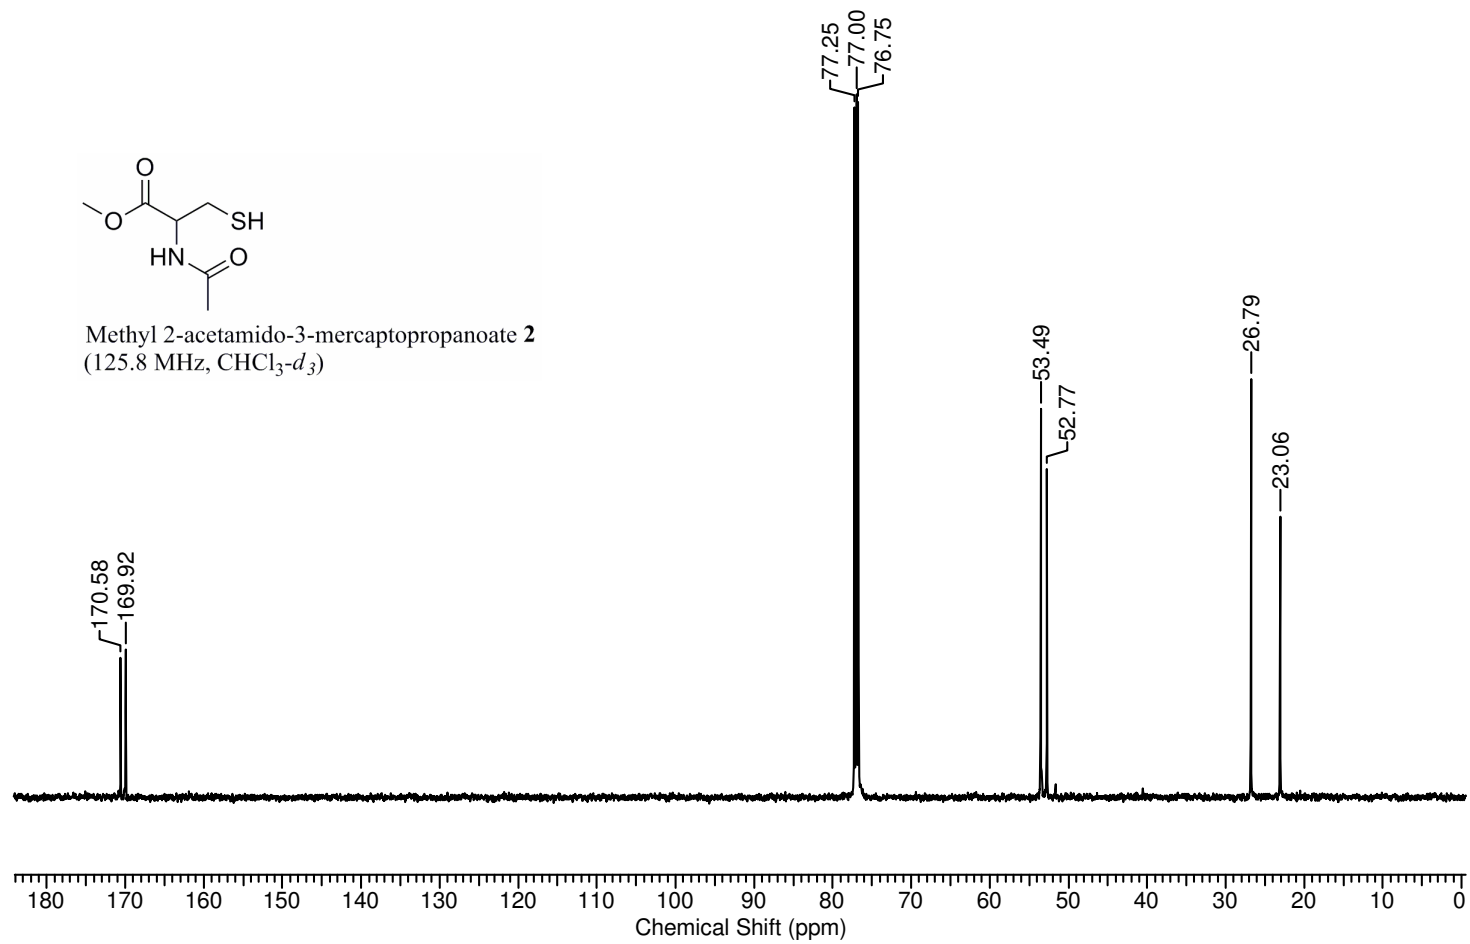

## Mass Spectrum Molecular Formula Report

### Analysis Info

Analysis Name D:\Data\Xiao\Oct 3 08000006.d  
Method xiaofengpos.m  
Sample Name rab-2  
Comment

Acquisition Date 10/3/2008 2:14:36 PM

Operator Administrator  
Instrument micrOTOF 57

### Acquisition Parameter

Source Type ESI  
Scan Range n/a  
Scan Begin 50 m/z  
Scan End 1500 m/z

Ion Polarity Positive  
Capillary Exit 150.0 V  
Hexapole RF 130.0 V  
Skimmer 1 55.0 V  
Hexapole 1 26.0 V

Set Corrector Fill 52 V  
Set Pulsar Pull 398 V  
Set Pulsar Push 398 V  
Set Reflector 1300 V  
Set Flight Tube 9000 V  
Set Detector TOF 1960 V

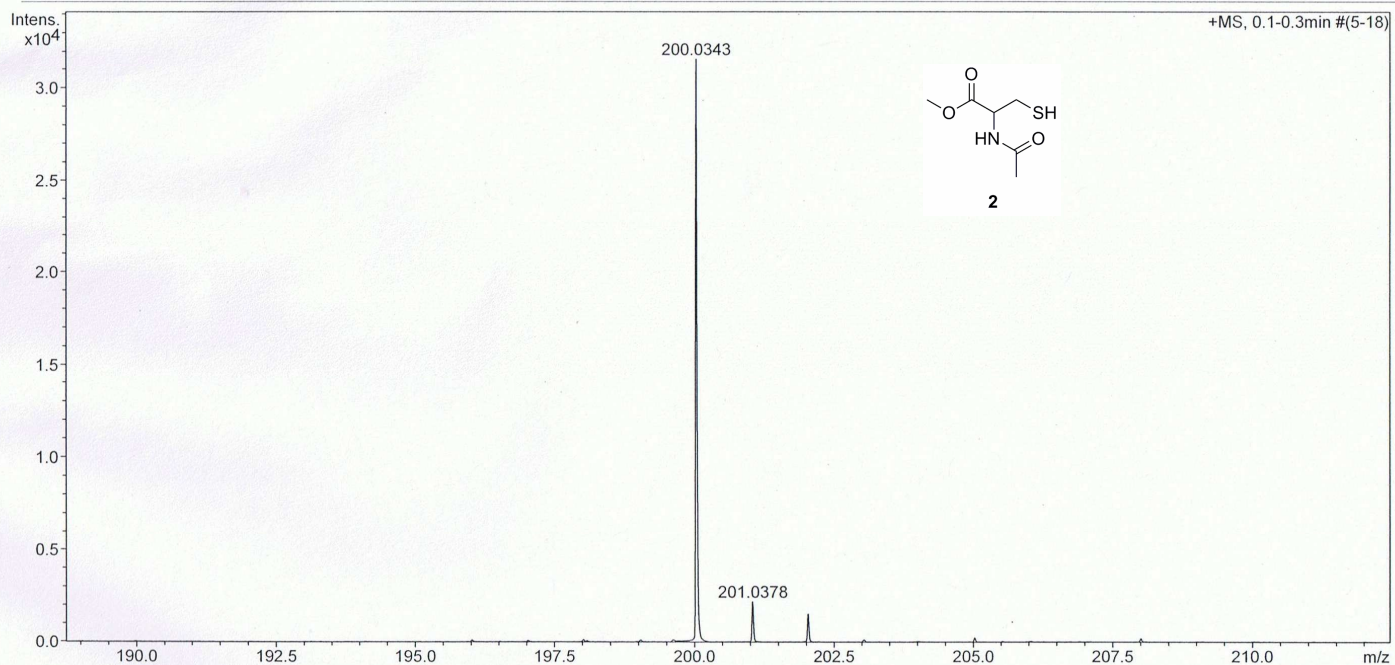

## HPLC analysis of methyl 2-acetamido-3-mercaptopropanoate (2)

Purity was determined using an Agilent Technologies 1200 series HPLC system with a photodiode UV-visible detector; column: Eclipse XDB-C<sub>18</sub> 4.6 x 150mm 5 µm C<sub>18</sub>; mobile phase: methanol; injection volume: 60 µL; UV detection: 235 nm; flow rate: 1 mL/min.

Data File C:\CHEM32\1\DATA\JEREMY\JER091008CFRACS 2008-10-09 15-09-59\EAH01062010B 2010-06-01 12-0  
Sample Name: EAH-8 frac

```
=====
Acq. Operator   : Ian                               Seq. Line :    2
Acq. Instrument : Instrument 1                       Location  : Vial 32
Injection Date  : 6/1/2010 12:13:54 PM              Inj       :    1
                                                    Inj Volume: 60 µl
Acq. Method     : C:\Chem32\1\DATA\JEREMY\JER091008CFRACS 2008-10-09 15-09-59\EAH01062010B
                : 2010-06-01 12-04-16\REV PHASE METHANOL 20UL.M
Last changed    : 6/1/2010 12:03:50 PM by Ian
Analysis Method : C:\CHEM32\1\DATA\JEREMY\JER091008CFRACS 2008-10-09 15-09-59\EAH01062010B
                : 2010-06-01 12-04-16\032-0201.D\DA.M (REV PHASE METHANOL 20UL.M)
Last changed    : 6/1/2010 1:24:12 PM by Ian
                : (modified after loading)
Method Info     : Alzheimer project - ShutDown
=====
```

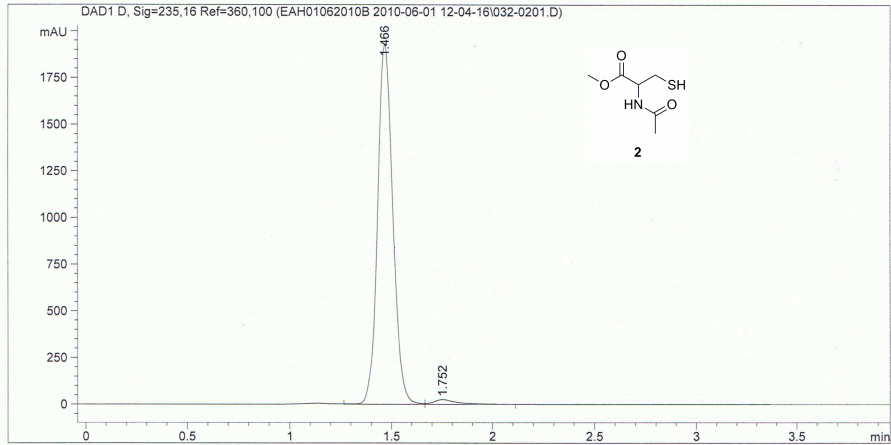

### Area Percent Report

```
Sorted By      :      Signal
Multiplier     :      1.0000
Dilution       :      1.0000
Use Multiplier & Dilution Factor with ISTDs
```

Signal 1: DAD1 D, Sig=235,16 Ref=360,100

| Peak # | RetTime [min] | Type | Width [min] | Area [mAU*s] | Height [mAU] | Area %  |
|--------|---------------|------|-------------|--------------|--------------|---------|
| 1      | 1.466         | VV   | 0.0807      | 1.00686e4    | 1934.15417   | 98.0426 |
| 2      | 1.752         | VB   | 0.1152      | 201.02078    | 25.15579     | 1.9574  |

Totals : 1.02696e4 1959.30997

Instrument 1 6/1/2010 1:24:16 PM Ian

Page 1 of 2

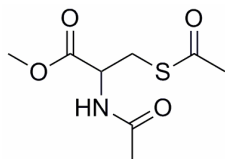

Methyl 2-acetamido-3-(acetylthio)propanoate **3**  
(500.1 MHz,  $\text{CHCl}_3-d_3$ )

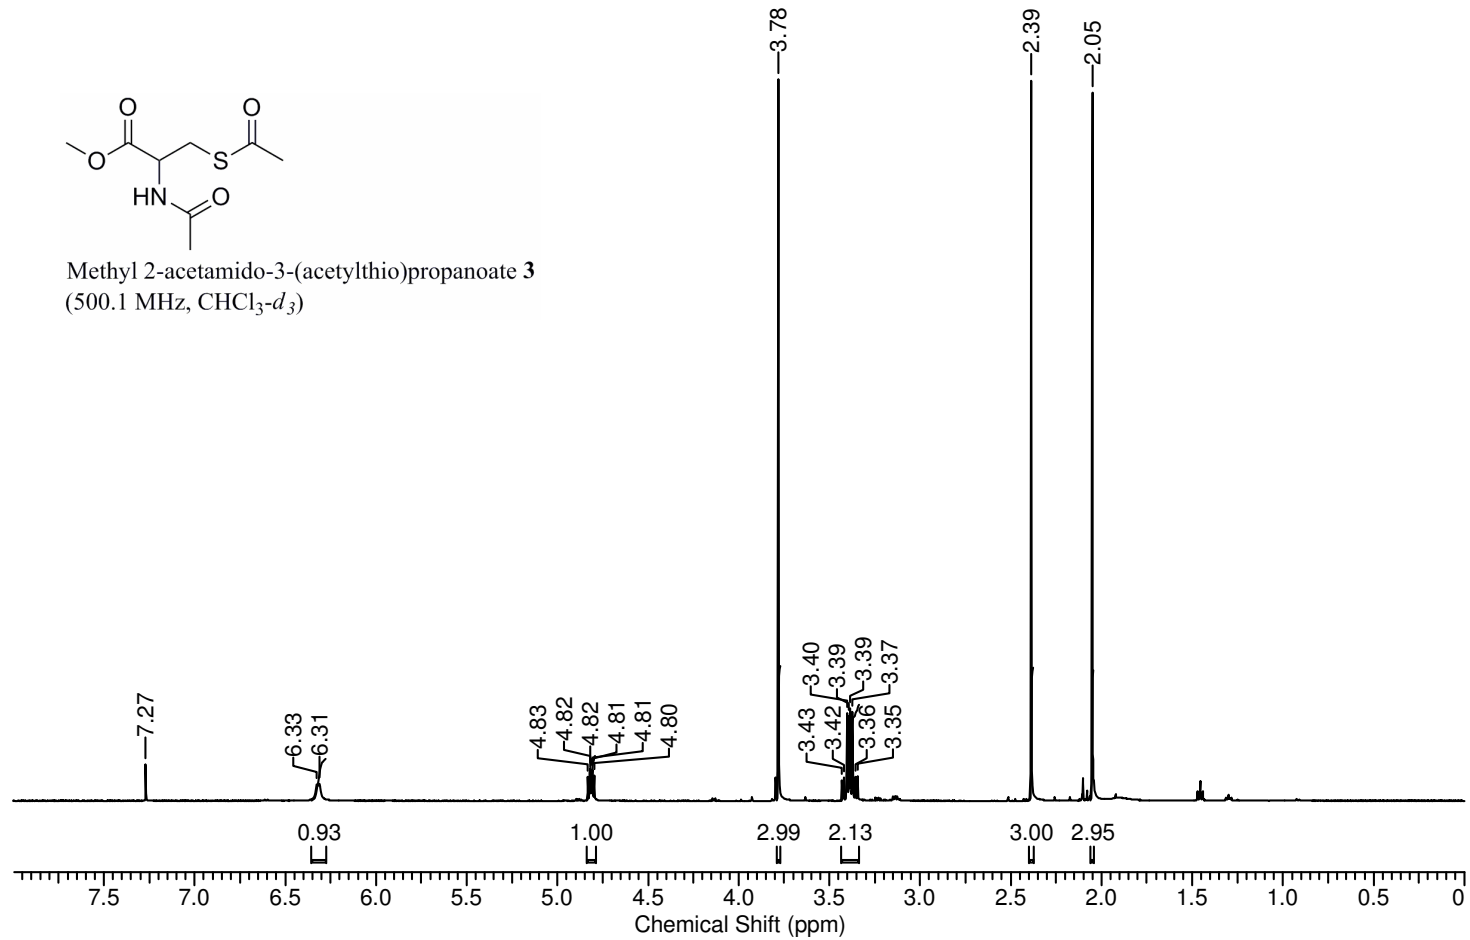

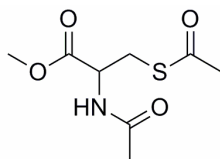

Methyl 2-acetamido-3-(acetylthio)propanoate **3**  
(125.8 MHz,  $\text{CHCl}_3-d_3$ )

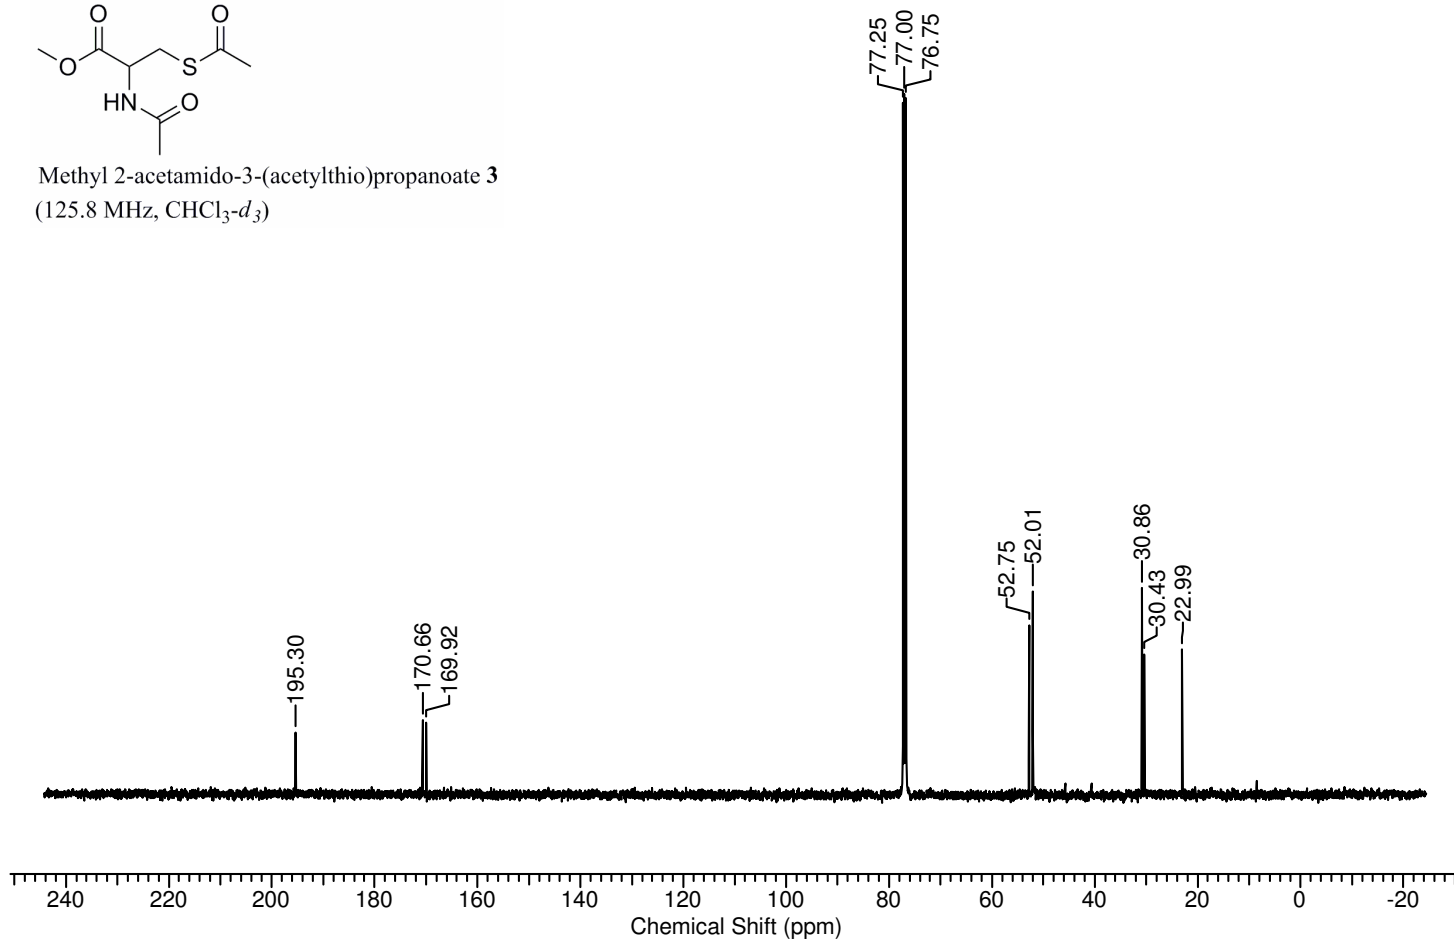



# Mass Spectrum Molecular Formula Report

## Analysis Info

Analysis Name D:\Data\Xiao\Oct 3 08000003.d  
Method xiaofengpos.m  
Sample Name rab-4  
Comment

Acquisition Date 10/3/2008 1:49:55 PM

Operator Administrator  
Instrument micrOTOF 57

## Acquisition Parameter

Source Type ESI  
Scan Range n/a  
Scan Begin 50 m/z  
Scan End 1500 m/z

Ion Polarity Positive  
Capillary Exit 150.0 V  
Hexapole RF 130.0 V  
Skimmer 1 55.0 V  
Hexapole 1 26.0 V

Set Corrector Fill 52 V  
Set Pulsar Pull 398 V  
Set Pulsar Push 398 V  
Set Reflector 1300 V  
Set Flight Tube 9000 V  
Set Detector TOF 1960 V

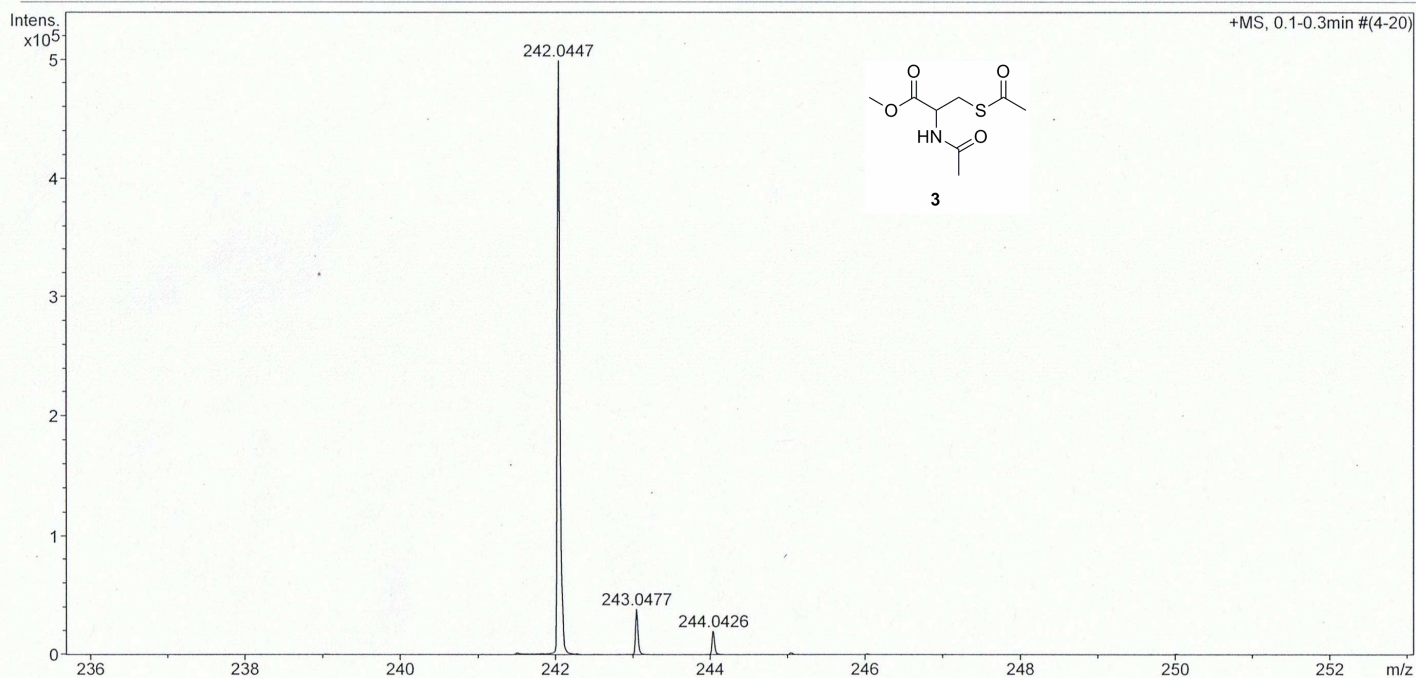

## HPLC analysis of methyl 2-acetamido-3-(acetylthio)propanoate (2)

Purity was determined using an Agilent Technologies 1200 series HPLC system with a photodiode UV-visible detector; column: Eclipse XDB-C<sub>18</sub> 4.6 x 150mm 5 µm C<sub>18</sub>; mobile phase: methanol; injection volume: 20 µL; UV detection: 235 nm; flow rate: 1 mL/min.

Data File C:\CHEM32\1\DATA\JEREMY\JER091008CFRACS 2008-10-09 15-09-59\EAH31052010C 2010-05-31 14-0  
Sample Name: RAB-4 frac

```
=====
Acq. Operator   : Ian                               Seq. Line :    2
Acq. Instrument : Instrument 1                       Location  : Vial 22
Injection Date  : 5/31/2010 2:17:44 PM              Inj       :    1
                                                    Inj Volume: 20 µl
Acq. Method    : C:\Chem32\1\DATA\JEREMY\JER091008CFRACS 2008-10-09 15-09-59\EAH31052010C
                2010-05-31 14-09-34\REV PHASE METHANOL 20UL.M
Last changed   : 5/31/2010 1:28:28 PM by Ian
Analysis Method: C:\CHEM32\1\DATA\JEREMY\JER091008CFRACS 2008-10-09 15-09-59\EAH31052010C
                2010-05-31 14-09-34\022-0201.D\DA.M (REV PHASE METHANOL 20UL.M)
Last changed   : 5/31/2010 2:26:19 PM by Ian
                (modified after loading)
Method Info    : Alzheimer project - ShutDown
=====
```

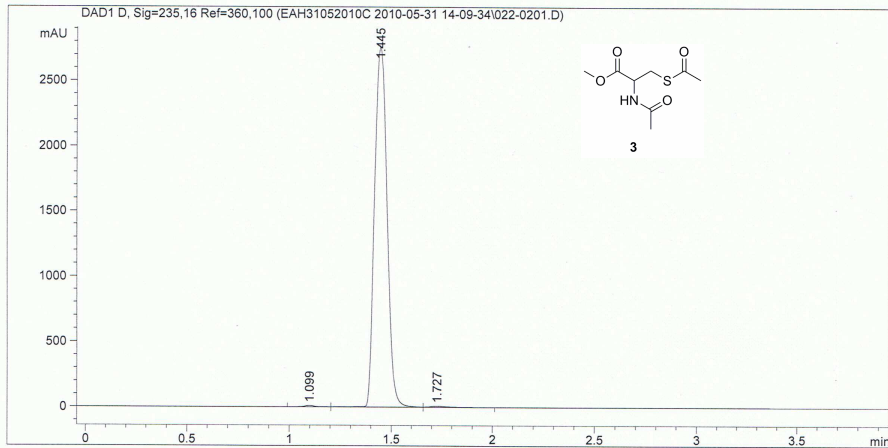

### Area Percent Report

```
Sorted By      : Signal
Multiplier     : 1.0000
Dilution       : 1.0000
Use Multiplier & Dilution Factor with ISTDs
```

Signal 1: DAD1 D, Sig=235,16 Ref=360,100

| Peak # | RetTime [min] | Type | Width [min] | Area [mAU*s] | Height [mAU] | Area %  |
|--------|---------------|------|-------------|--------------|--------------|---------|
| 1      | 1.099         | BV   | 0.0630      | 43.74969     | 10.42287     | 0.3671  |
| 2      | 1.445         | VV   | 0.0697      | 1.18105e4    | 2771.47900   | 99.1010 |
| 3      | 1.727         | VB   | 0.1022      | 63.39398     | 8.78621      | 0.5319  |

Totals : 1.19177e4 2790.68808

Instrument 1 5/31/2010 2:26:22 PM Ian

Page 1 of 2

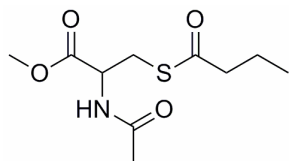

Methyl 2-acetamido-3-(butyrylthio)propanoate **4**  
(500.1 MHz, DMSO-*d*<sub>6</sub>)

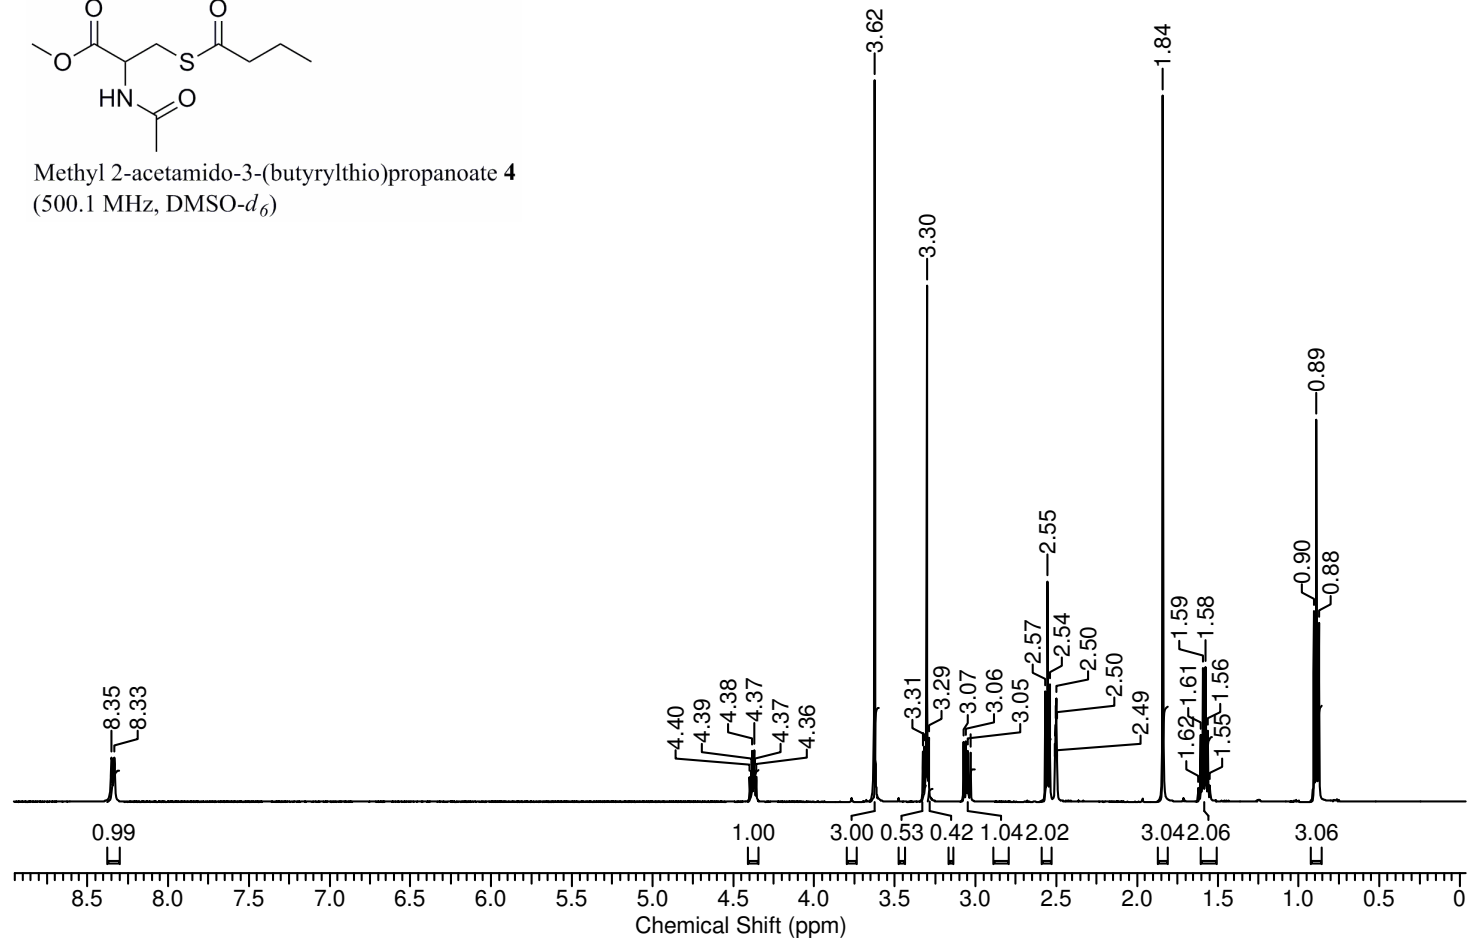

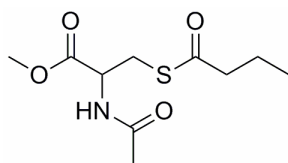

Methyl 2-acetamido-3-(butyrylthio)propanoate **4**  
(125.8 MHz, DMSO-*d*<sub>6</sub>)

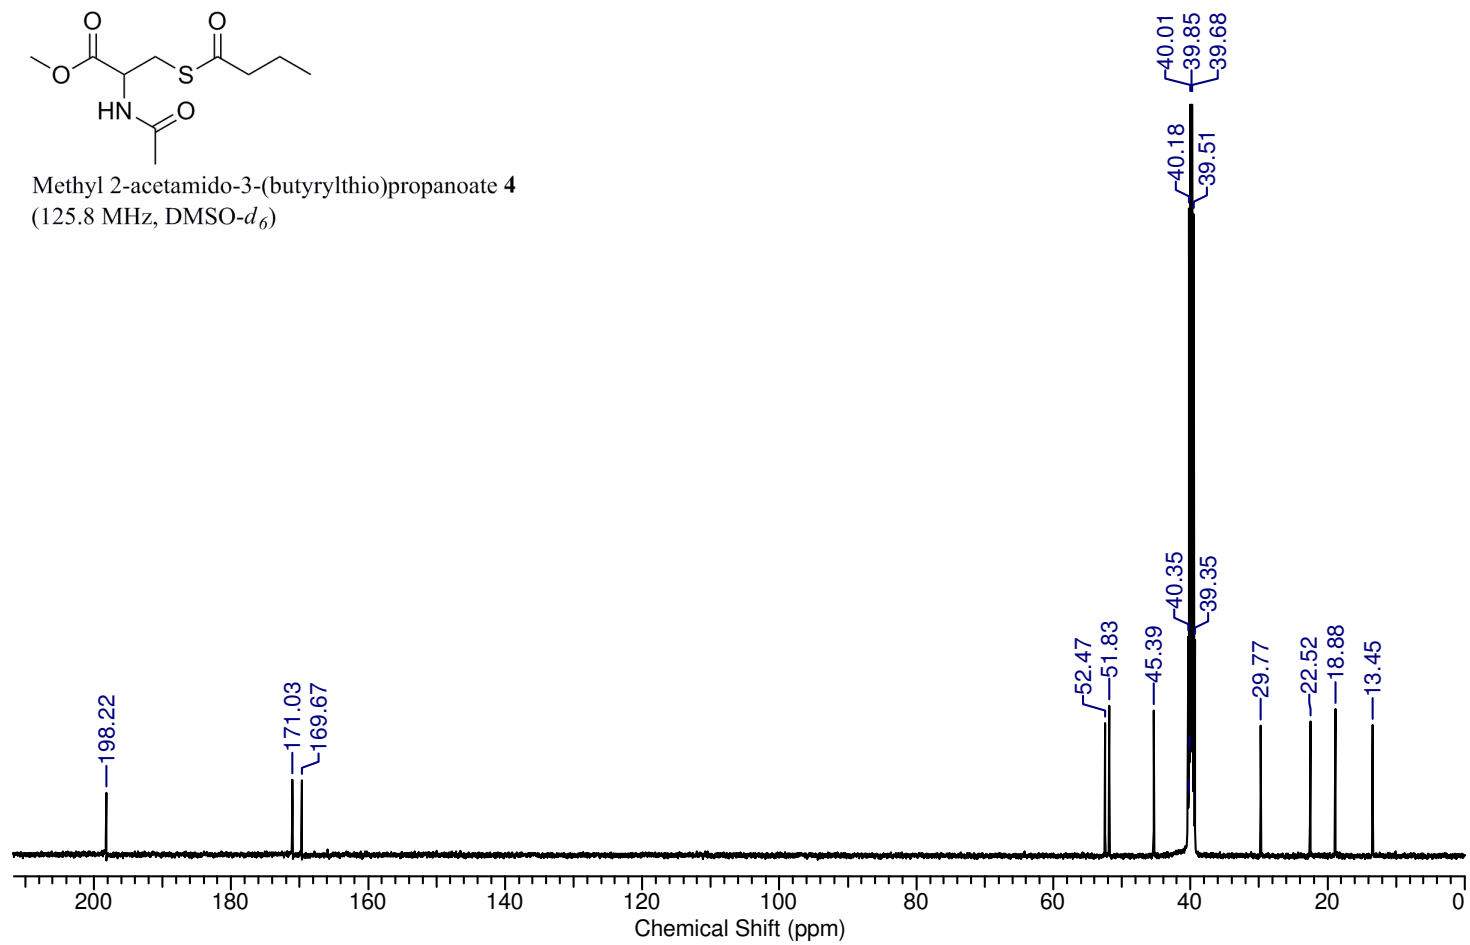

# Mass Spectrum Molecular Formula Report

## Analysis Info

Analysis Name D:\Data\Xiao\Oct 3 08000001.d  
Method xiaofengpos.m  
Sample Name rab-5  
Comment

Acquisition Date 10/3/2008 1:32:09 PM

Operator  
Instrument Administrator  
microTOF 57

## Acquisition Parameter

Source Type ESI  
Scan Range n/a  
Scan Begin 50 m/z  
Scan End 1500 m/z

Ion Polarity Positive  
Capillary Exit 150.0 V  
Hexapole RF 130.0 V  
Skimmer 1 55.0 V  
Hexapole 1 26.0 V

Set Corrector Fill 52 V  
Set Pulsar Pull 398 V  
Set Pulsar Push 398 V  
Set Reflector 1300 V  
Set Flight Tube 9000 V  
Set Detector TOF 1960 V

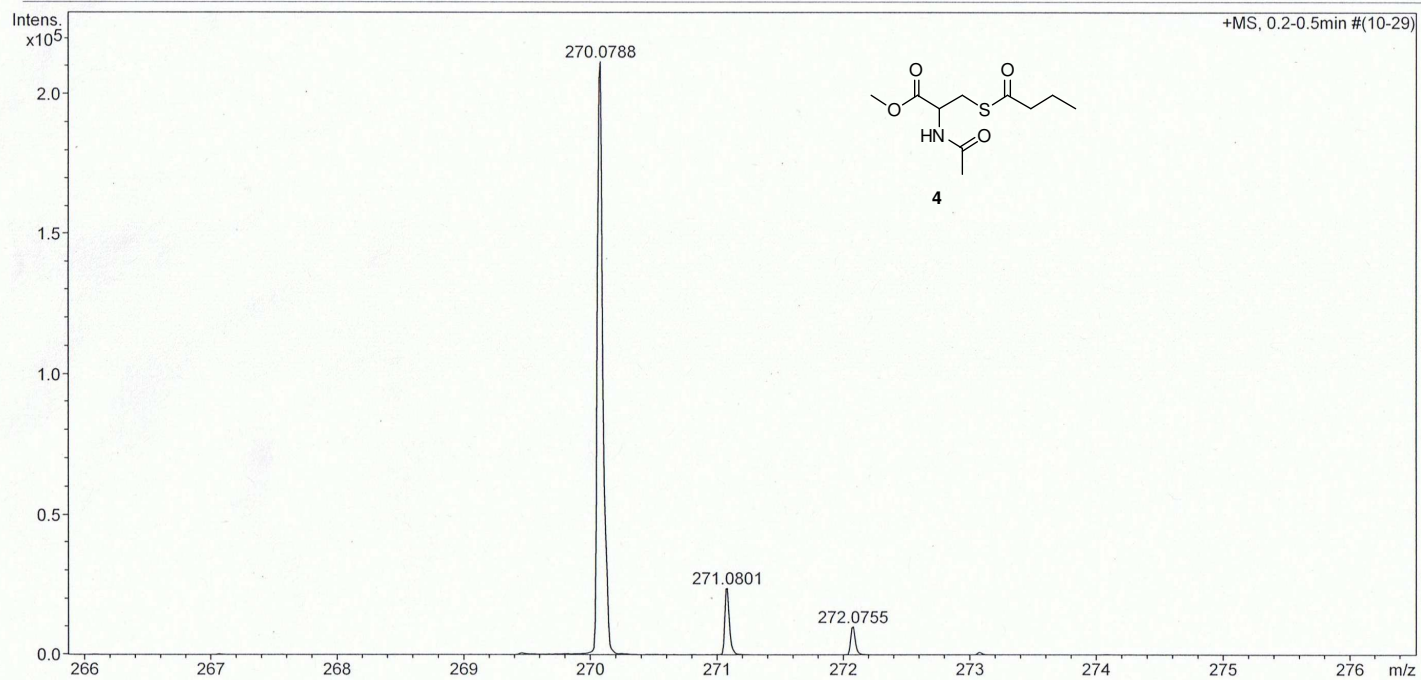

## HPLC analysis of methyl 2-acetamido-3-(butyrylthio)propanoate (4)

Purity was determined using an Agilent Technologies 1200 series HPLC system with a photodiode UV-visible detector; column: Eclipse XDB-C<sub>18</sub> 4.6 x 150mm 5 µm C<sub>18</sub>; mobile phase: methanol; injection volume: 20 µL; UV detection: 254 nm; flow rate: 1 mL/min.

Data File C:\CHEM32\1\DATA\JEREMY\JER091008CFRACS 2008-10-09 15-09-59\EAH26052010A 2010-05-26 10-1  
Sample Name: RAB-5

```
=====
Acq. Operator   : Ian                               Seq. Line :    8
Acq. Instrument : Instrument 1                       Location  : Vial 45
Injection Date  : 5/26/2010 11:11:27 AM            Inj       :    1
                                                    Inj Volume: 20 µl
Acq. Method     : C:\Chem32\1\DATA\JEREMY\JER091008CFRACS 2008-10-09 15-09-59\EAH26052010A
                : 2010-05-26 10-15-38\REV PHASE METHANOL 20UL.M
Last changed    : 5/5/2010 2:09:53 PM by Ian
Analysis Method : C:\CHEM32\1\DATA\JEREMY\JER091008CFRACS 2008-10-09 15-09-59\EAH26052010A
                : 2010-05-26 10-15-38\045-0801.D\DA.M (REV PHASE METHANOL 20UL.M)
Last changed    : 5/26/2010 1:49:28 PM by Ian
                : (modified after loading)
Method Info     : Reverse Phase Methanol
=====
```

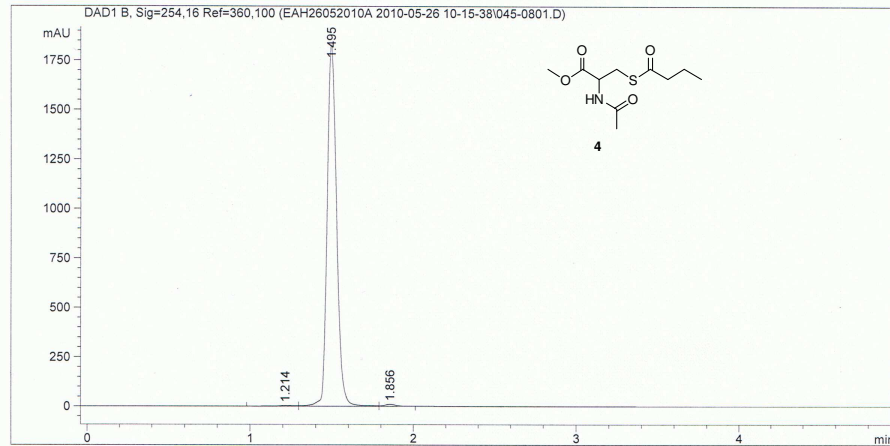

### Area Percent Report

```
Sorted By      : Signal
Multiplier     : 1.0000
Dilution       : 1.0000
Use Multiplier & Dilution Factor with ISTDs
```

Signal 1: DAD1 B, Sig=254,16 Ref=360,100

| Peak # | RetTime [min] | Type | Width [min] | Area [mAU*s] | Height [mAU] | Area %  |
|--------|---------------|------|-------------|--------------|--------------|---------|
| 1      | 1.214         | BV   | 0.1054      | 34.47628     | 4.30508      | 0.4628  |
| 2      | 1.495         | VV   | 0.0627      | 7367.03809   | 1841.66760   | 98.8906 |
| 3      | 1.856         | VB   | 0.0720      | 48.17263     | 10.03880     | 0.6466  |

Totals : 7449.68700 1856.01149

Instrument 1 5/26/2010 1:49:33 PM Ian

Page 1 of 2

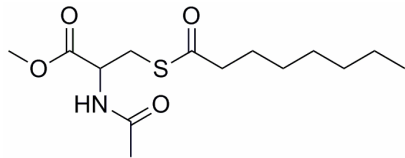

Methyl 2-acetamido-3-(octanoylthio)propanoate **5**  
(500.1 MHz,  $\text{CHCl}_3-d_3$ )

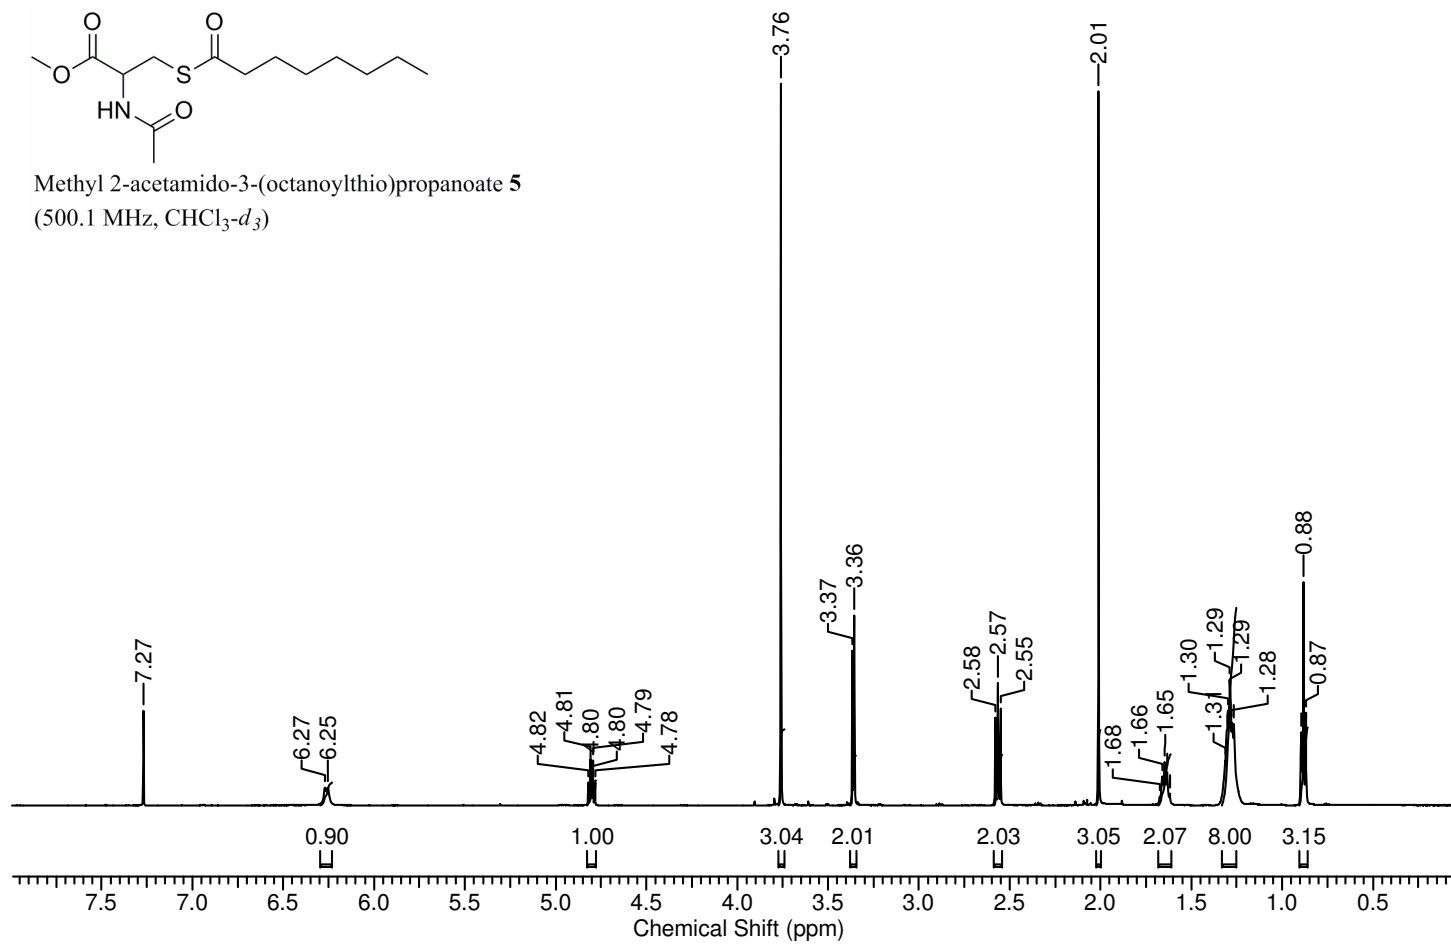

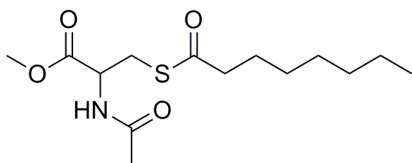

Methyl 2-acetamido-3-(octanoylthio)propanoate **5**  
(125.8 MHz,  $\text{CHCl}_3-d_3$ )

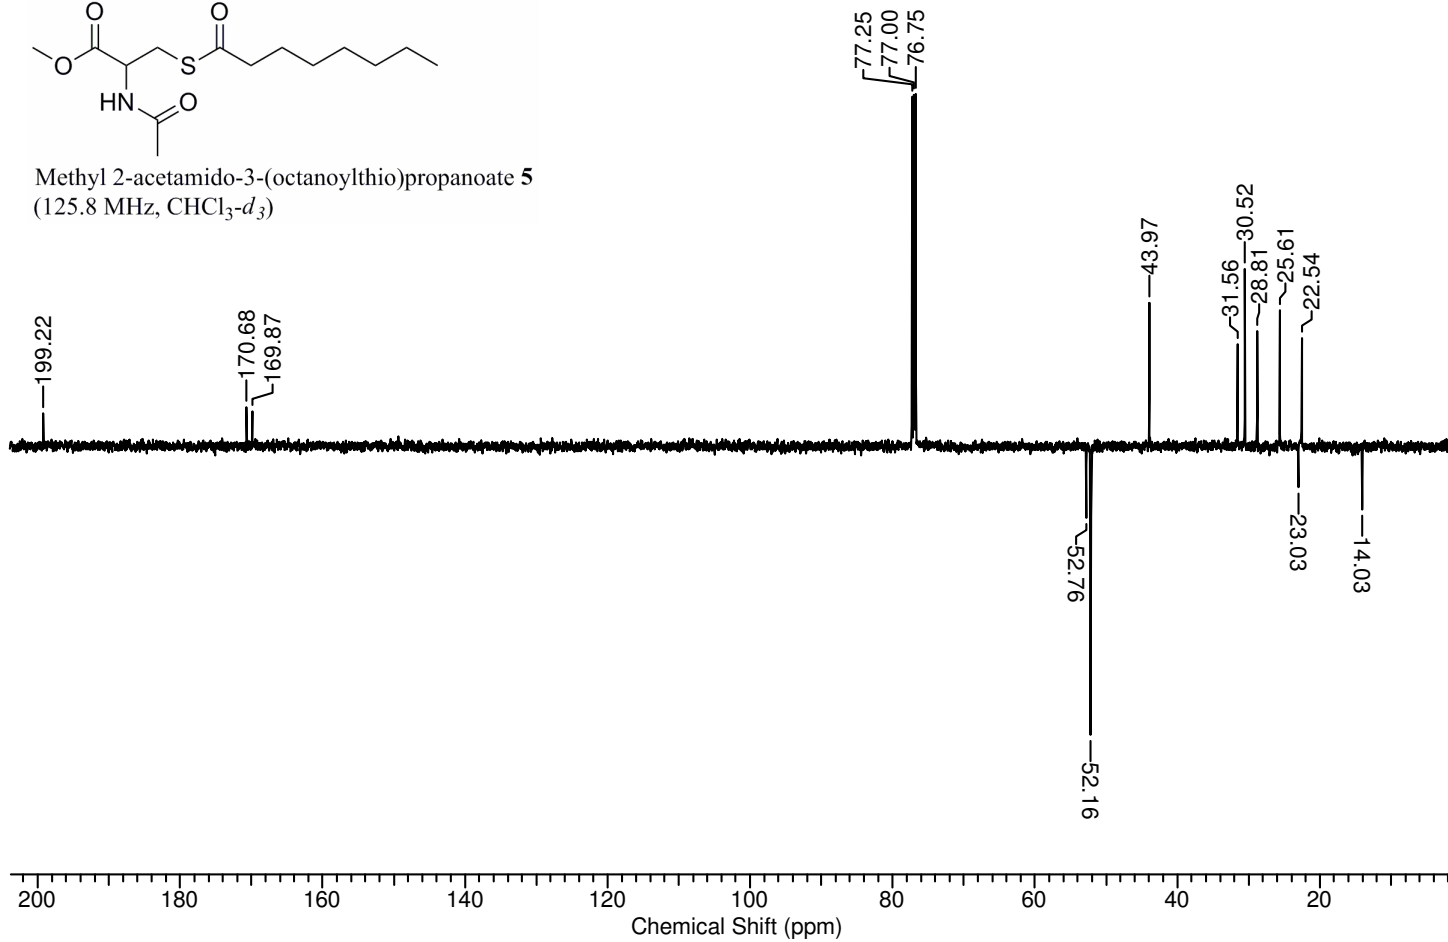



# Mass Spectrum Molecular Formula Report

## Analysis Info

Analysis Name D:\Data\Xiao\Jan 28 10000006.d  
Method xiaofengpos.m  
Sample Name EAH-17  
Comment

Acquisition Date 1/28/2010 2:14:22 PM  
Operator Administrator  
Instrument micrOTOF 57

## Acquisition Parameter

Source Type ESI  
Scan Range n/a  
Scan Begin 50 m/z  
Scan End 1500 m/z

Ion Polarity Positive  
Capillary Exit 100.0 V  
Hexapole RF 150.0 V  
Skimmer 1 55.0 V  
Hexapole 1 26.0 V

Set Corrector Fill 52 V  
Set Pulsar Pull 398 V  
Set Pulsar Push 398 V  
Set Reflector 1300 V  
Set Flight Tube 9000 V  
Set Detector TOF 1960 V

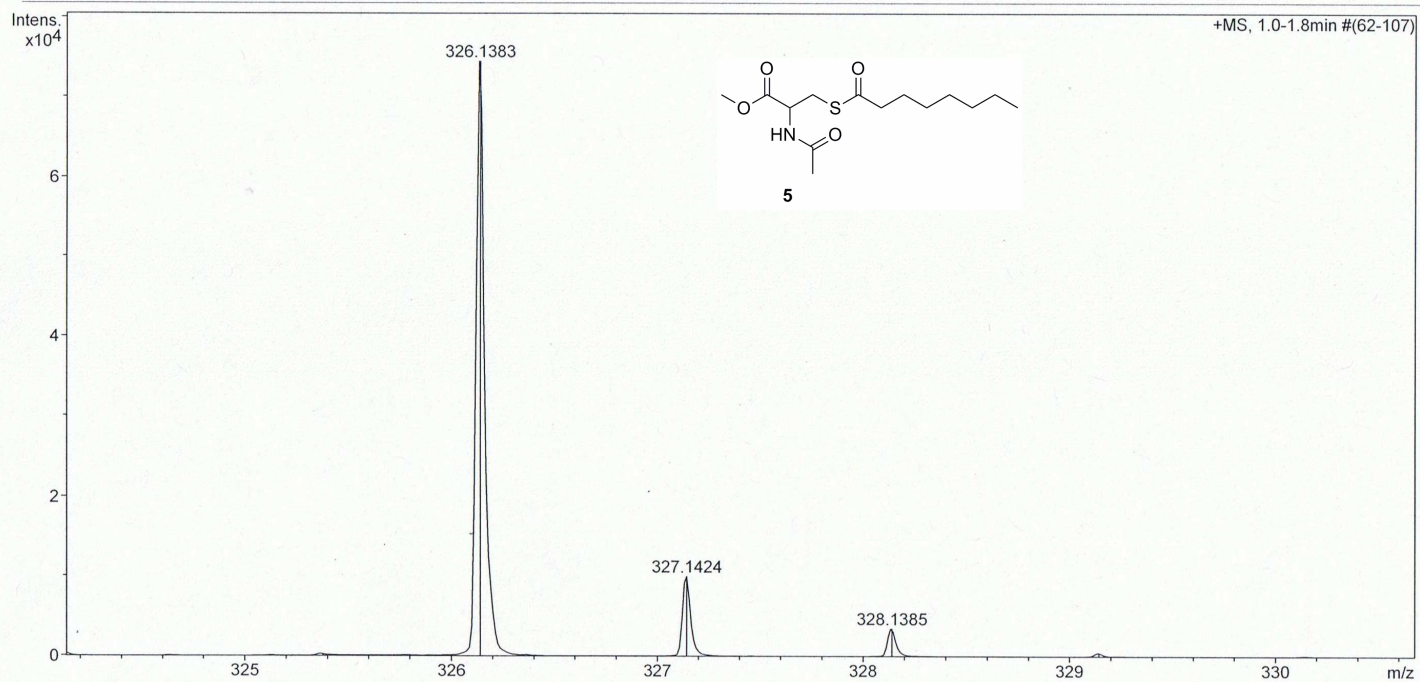

## HPLC analysis of methyl 2-acetamido-3-(octanoylthio)propanoate (5)

Purity was determined using an Agilent Technologies 1200 series HPLC system with a photodiode UV-visible detector; column: Eclipse XDB-C<sub>18</sub> 4.6 x 150mm 5 µm C<sub>18</sub>; mobile phase: methanol; injection volume: 50 µL; UV detection: 220 nm; flow rate: 1 mL/min.

Data File C:\CHEM32\1\DATA\EMMA HIGGINS\EAH12022010E 2010-02-12 15-48-16\056-1001.D  
Sample Name: EAH-17

```
=====
Acq. Operator   : Ian                               Seq. Line : 10
Acq. Instrument : Instrument 1                       Location  : Vial 56
Injection Date  : 2/12/2010 5:25:08 PM              Inj       : 1
                                                    Inj Volume: 50 µl
Acq. Method     : C:\Chem32\1\DATA\EMMA HIGGINS\EAH12022010E 2010-02-12 15-48-16\REV PHASE
HEN METHANOL 50UL FRACON.M
Last changed    : 1/28/2010 2:13:55 PM by Ian
Analysis Method : C:\CHEM32\1\DATA\EMMA HIGGINS\EAH12022010E 2010-02-12 15-48-16\056-1001.D\
DA.M (REV PHASE HEN METHANOL 50UL FRACON.M)
Last changed    : 5/25/2010 3:57:52 PM by Ian
(modified after loading)
Method Info     : Reverse Phase Methanol
=====
```

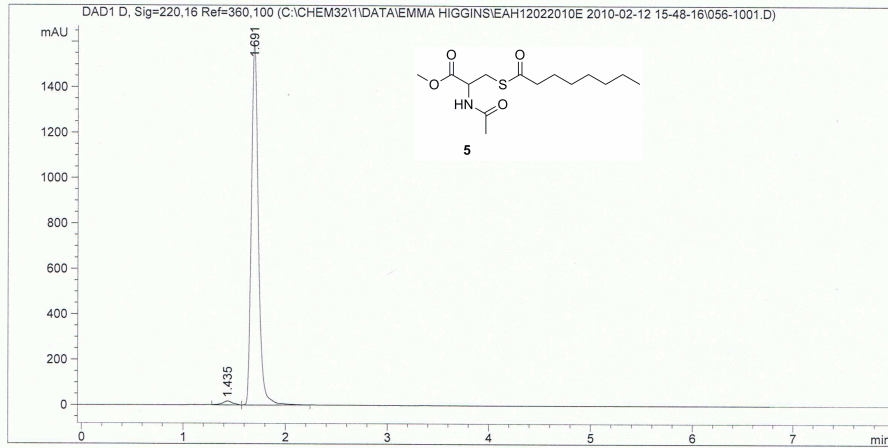

### Area Percent Report

```
=====
Sorted By      : Signal
Multiplier     : 1.0000
Dilution       : 1.0000
Use Multiplier & Dilution Factor with ISTDs
=====
```

Signal 1: DAD1 D, Sig=220,16 Ref=360,100

| Peak # | RetTime [min] | Type | Width [min] | Area [mAU*s] | Height [mAU] | Area %  |
|--------|---------------|------|-------------|--------------|--------------|---------|
| 1      | 1.435         | VV   | 0.0998      | 128.47316    | 18.31710     | 1.6633  |
| 2      | 1.691         | VB   | 0.0716      | 7595.43359   | 1594.50146   | 98.3367 |

Totals : 7723.90675 1612.81857

Instrument 1 5/25/2010 3:57:56 PM Ian

Page 1 of 2

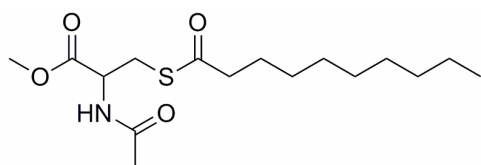

Methyl 2-acetamido-3-(decanoylthio)propanoate **6**  
(500.1 MHz, CHCl<sub>3</sub>-d<sub>3</sub>)

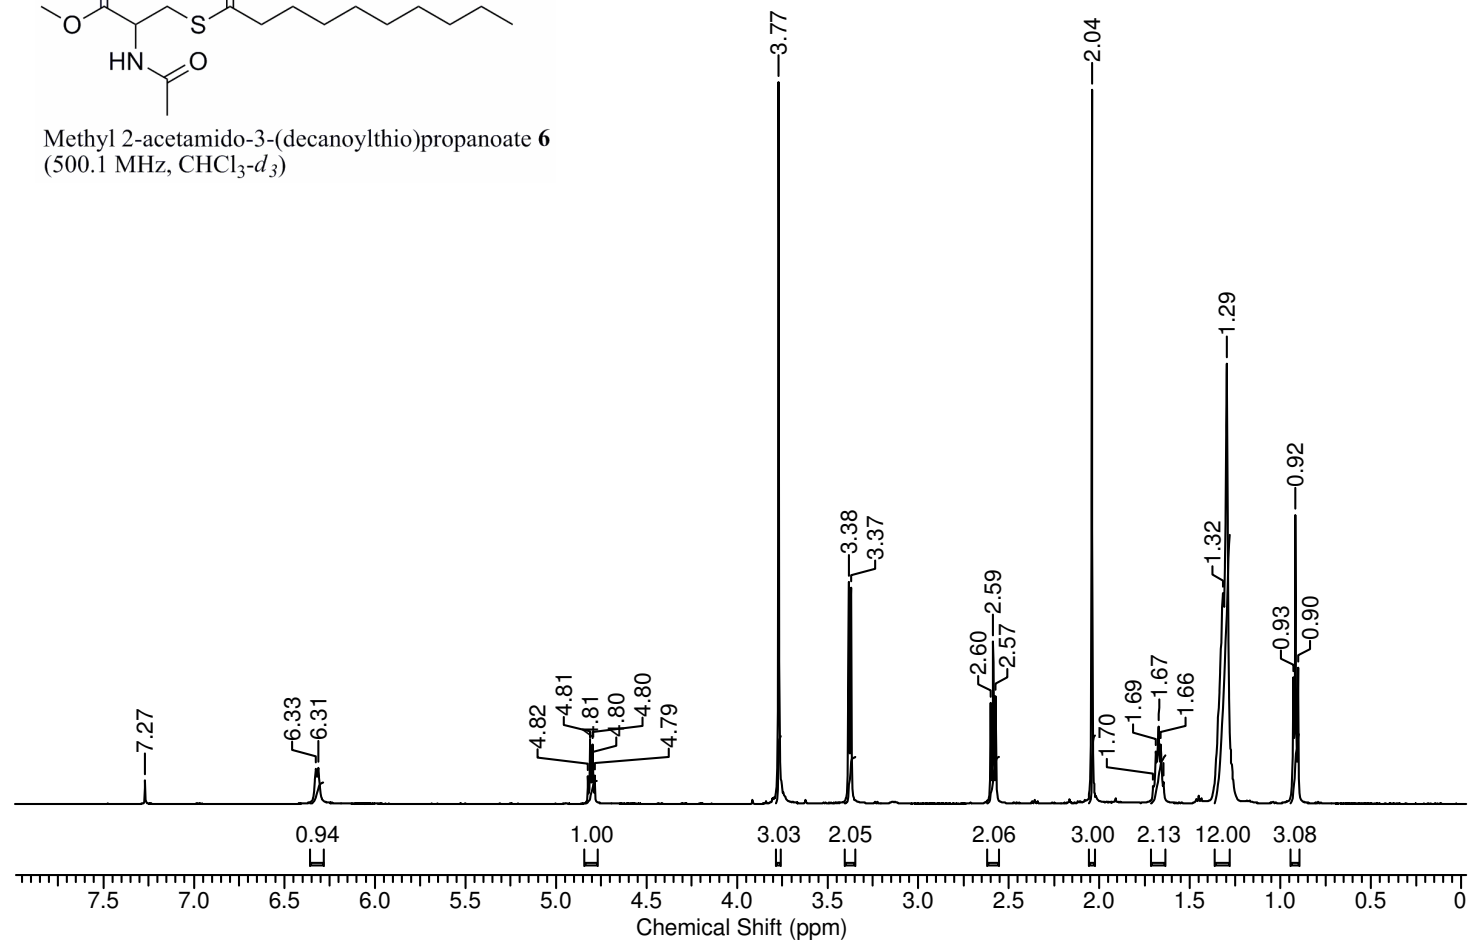

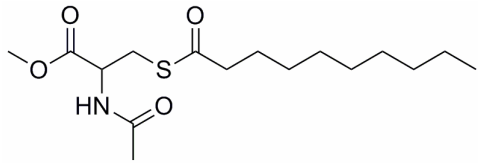

Methyl 2-acetamido-3-(decanoylthio)propanoate **6**  
(125.8 MHz,  $\text{CHCl}_3-d_3$ )

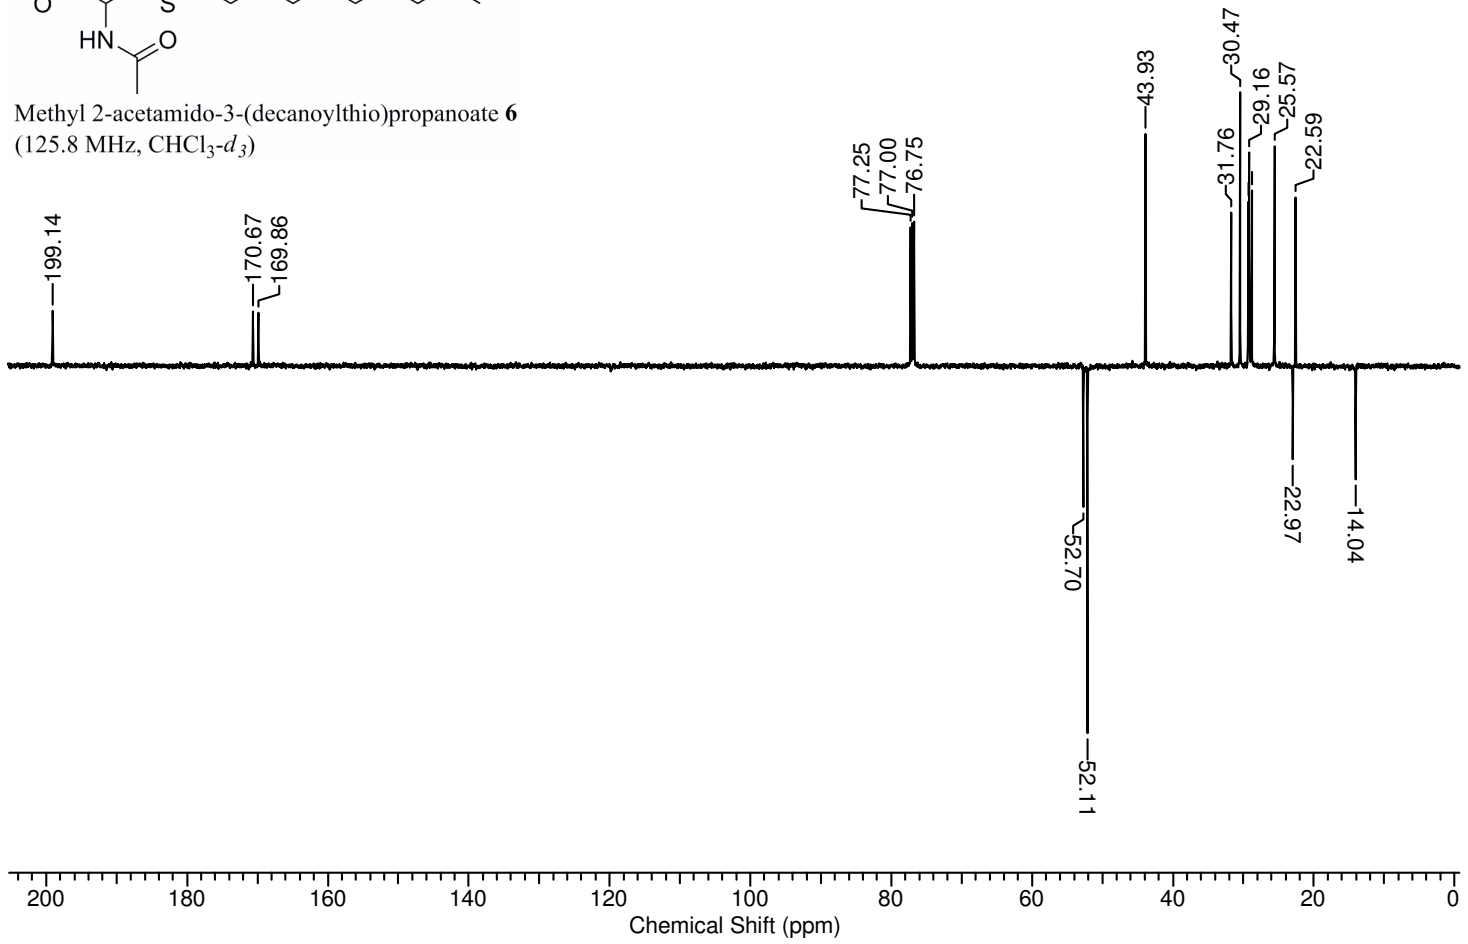

## Mass Spectrum Molecular Formula Report

### Analysis Info

Analysis Name D:\Data\Xiao\Jan 28 10000005.d  
Method xiaofengpos.m  
Sample Name EAH-16  
Comment

Acquisition Date 1/28/2010 2:06:13 PM

Operator Administrator  
Instrument micrOTOF 57

### Acquisition Parameter

Source Type ESI  
Scan Range n/a  
Scan Begin 50 m/z  
Scan End 1500 m/z

Ion Polarity Positive  
Capillary Exit 100.0 V  
Hexapole RF 150.0 V  
Skimmer 1 55.0 V  
Hexapole 1 26.0 V

Set Corrector Fill 52 V  
Set Pulsar Pull 398 V  
Set Pulsar Push 398 V  
Set Reflector 1300 V  
Set Flight Tube 9000 V  
Set Detector TOF 1960 V

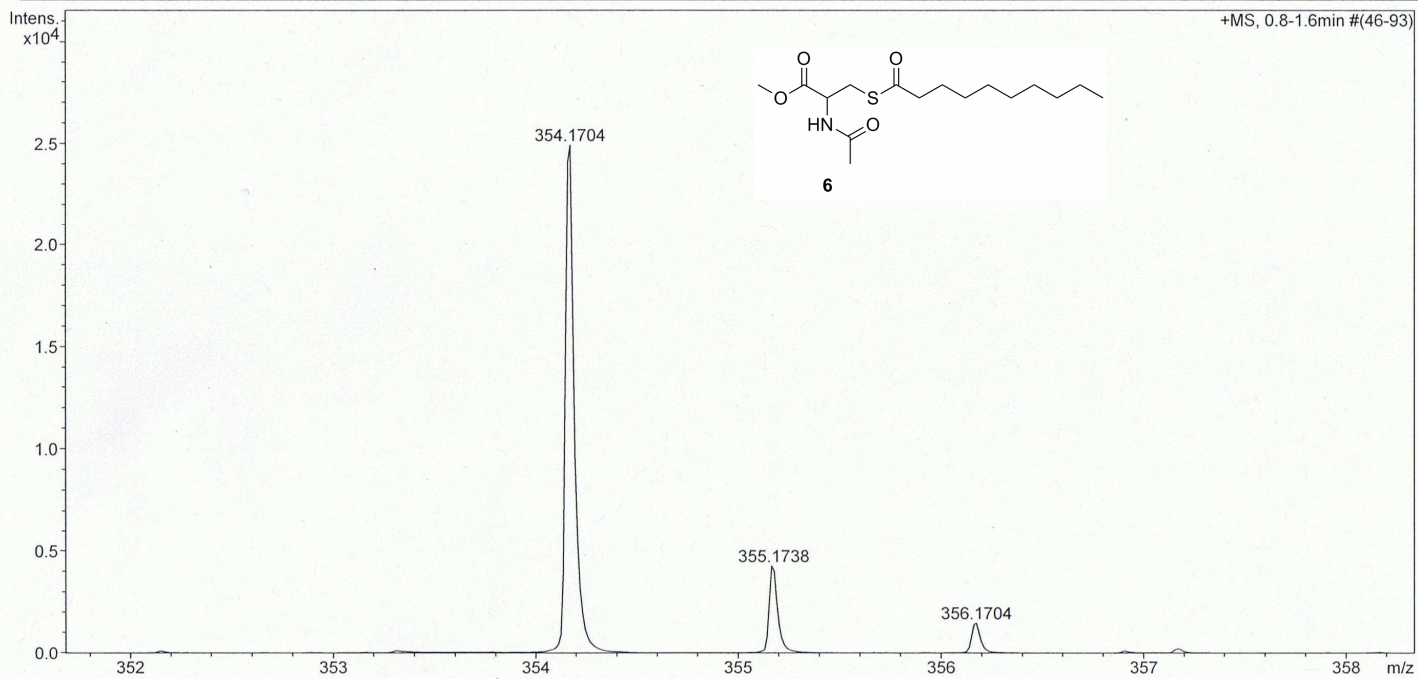

## HPLC analysis of methyl 2-acetamido-3-(decanoylthio)propanoate (6)

Purity was determined using an Agilent Technologies 1200 series HPLC system with a photodiode UV-visible detector; column: Eclipse XDB-C<sub>18</sub> 4.6 x 150mm 5 µm C<sub>18</sub>; mobile phase: methanol; injection volume: 70 µL; UV detection: 254 nm; flow rate: 1 mL/min.

Data File C:\CHEM32\1\DATA\JEREMY\JER091008CFRACS 2008-10-09 15-09-59\EAH01062010D 2010-06-01 15-1  
Sample Name: EAH-16 frac

```
=====
Acq. Operator   : Ian                               Seq. Line :    2
Acq. Instrument : Instrument 1                       Location  : Vial 42
Injection Date  : 6/1/2010 3:23:15 PM                Inj       :    1
                                                    Inj Volume: 70 µl
Acq. Method     : C:\Chem32\1\DATA\JEREMY\JER091008CFRACS 2008-10-09 15-09-59\EAH01062010D
                : 2010-06-01 15-13-15\REV PHASE METHANOL 20UL.M
Last changed    : 6/1/2010 3:13:02 PM by Ian
Analysis Method : C:\CHEM32\1\DATA\JEREMY\JER091008CFRACS 2008-10-09 15-09-59\EAH01062010D
                : 2010-06-01 15-13-15\042-0201.D\DA.M (REV PHASE METHANOL 20UL.M)
Last changed    : 6/1/2010 3:35:21 PM by Ian
                : (modified after loading)
Method Info     : Alzheimer project - ShutDown
=====
```

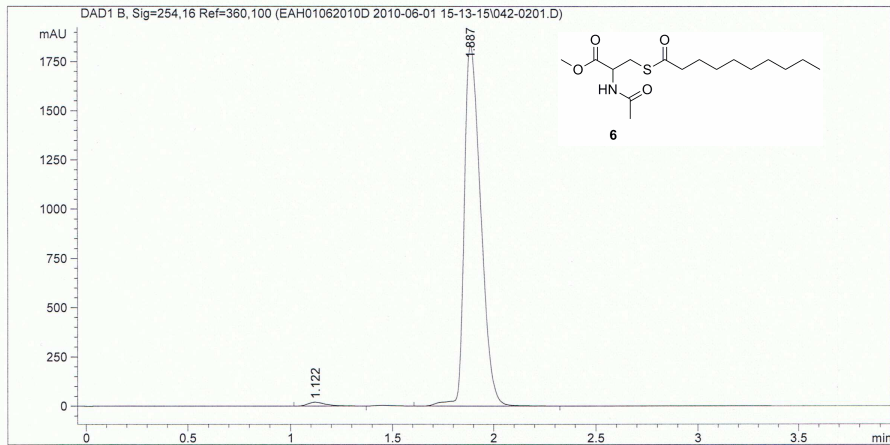

### Area Percent Report

```
Sorted By      : Signal
Multiplier     : 1.0000
Dilution       : 1.0000
Use Multiplier & Dilution Factor with ISTDs
```

Signal 1: DAD1 B, Sig=254,16 Ref=360,100

| Peak # | RetTime [min] | Type | Width [min] | Area [mAU*s] | Height [mAU] | Area %  |
|--------|---------------|------|-------------|--------------|--------------|---------|
| 1      | 1.122         | BB   | 0.0938      | 128.19121    | 20.27837     | 1.2187  |
| 2      | 1.887         | VB   | 0.0898      | 1.03904e4    | 1841.08044   | 98.7813 |

Totals : 1.05186e4 1861.35882

Instrument 1 6/1/2010 3:35:24 PM Ian

Page 1 of 2

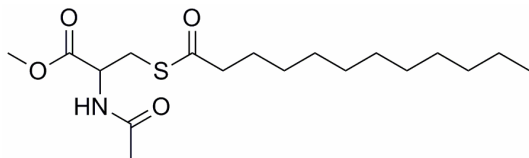

Methyl 2-acetamido-3-(dodecanoylthio)propanoate **7**  
(500.1 MHz,  $\text{CHCl}_3-d_3$ )

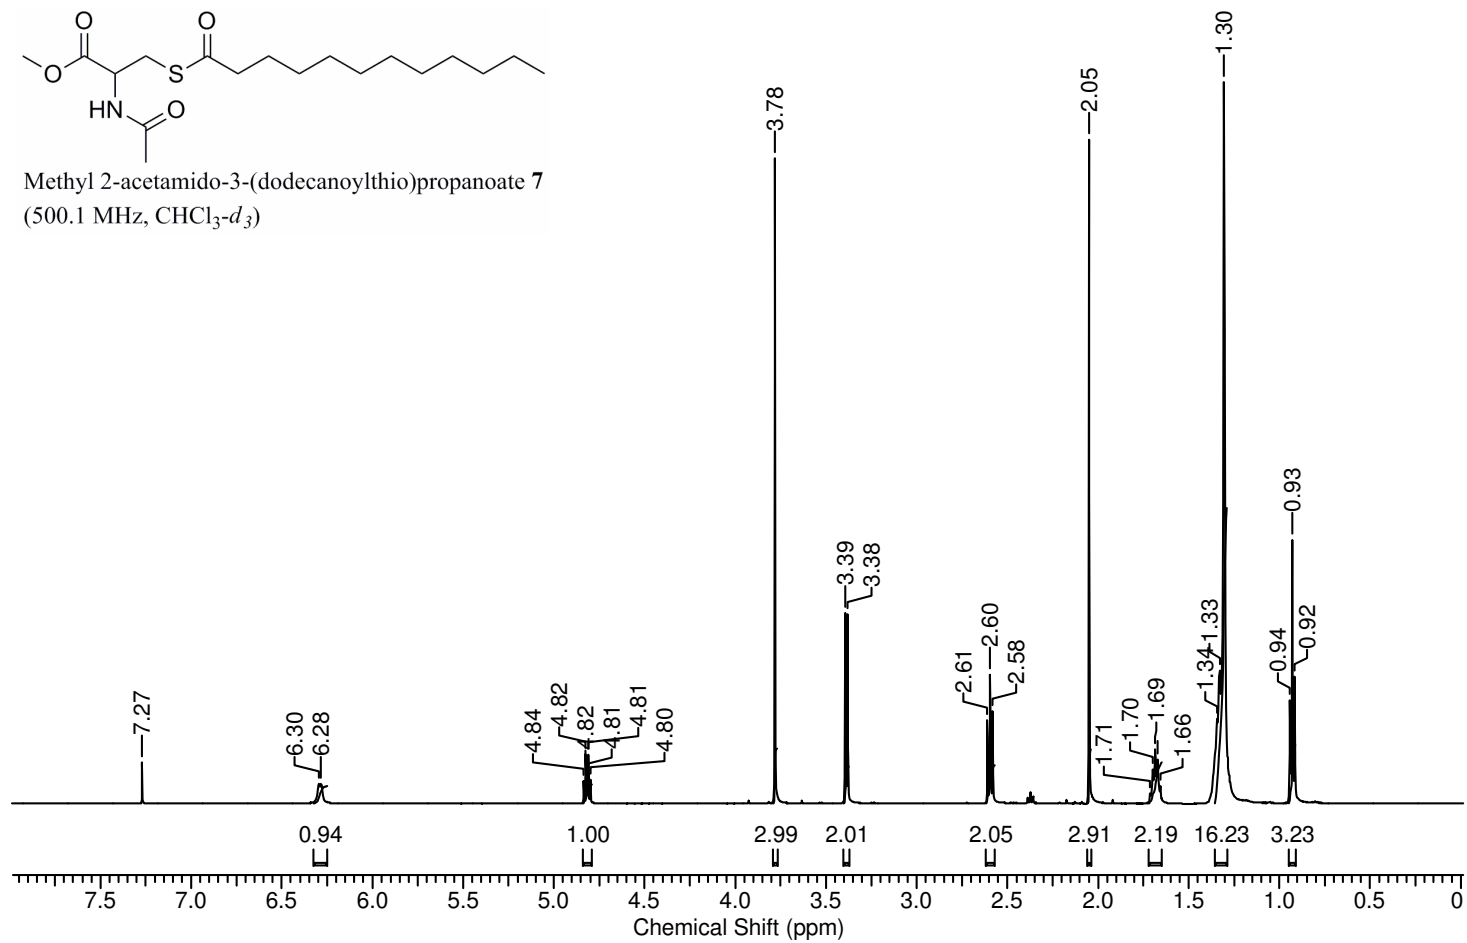

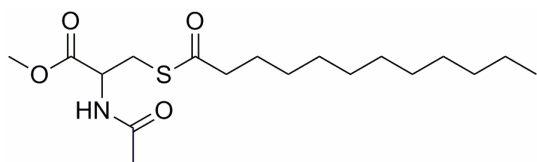

Methyl 2-acetamido-3-(dodecanoylthio)propanoate **7**  
(125.8 MHz,  $\text{CHCl}_3-d_3$ )

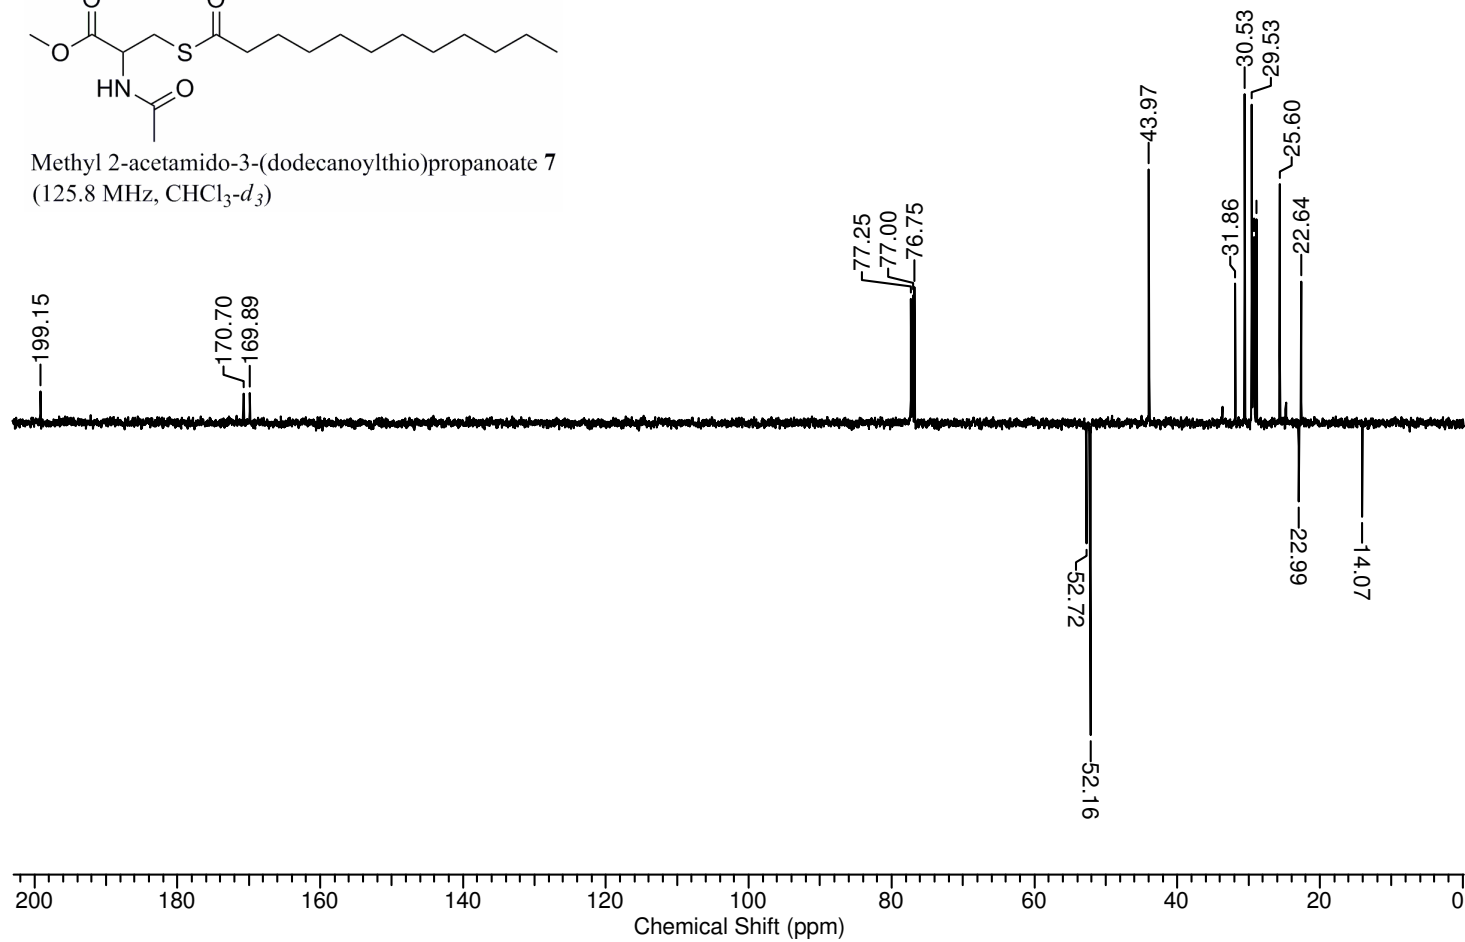



# Mass Spectrum Molecular Formula Report

## Analysis Info

Analysis Name D:\Data\Xiao\Oct 3 08000004.d  
Method xiaofengpos.m  
Sample Name rab-6  
Comment

Acquisition Date 10/3/2008 1:57:36 PM

Operator Administrator  
Instrument micrOTOF 57

## Acquisition Parameter

Source Type ESI  
Scan Range n/a  
Scan Begin 50 m/z  
Scan End 1500 m/z

Ion Polarity Positive  
Capillary Exit 150.0 V  
Hexapole RF 130.0 V  
Skimmer 1 55.0 V  
Hexapole 1 26.0 V

Set Corrector Fill 52 V  
Set Pulsar Pull 398 V  
Set Pulsar Push 398 V  
Set Reflector 1300 V  
Set Flight Tube 9000 V  
Set Detector TOF 1960 V

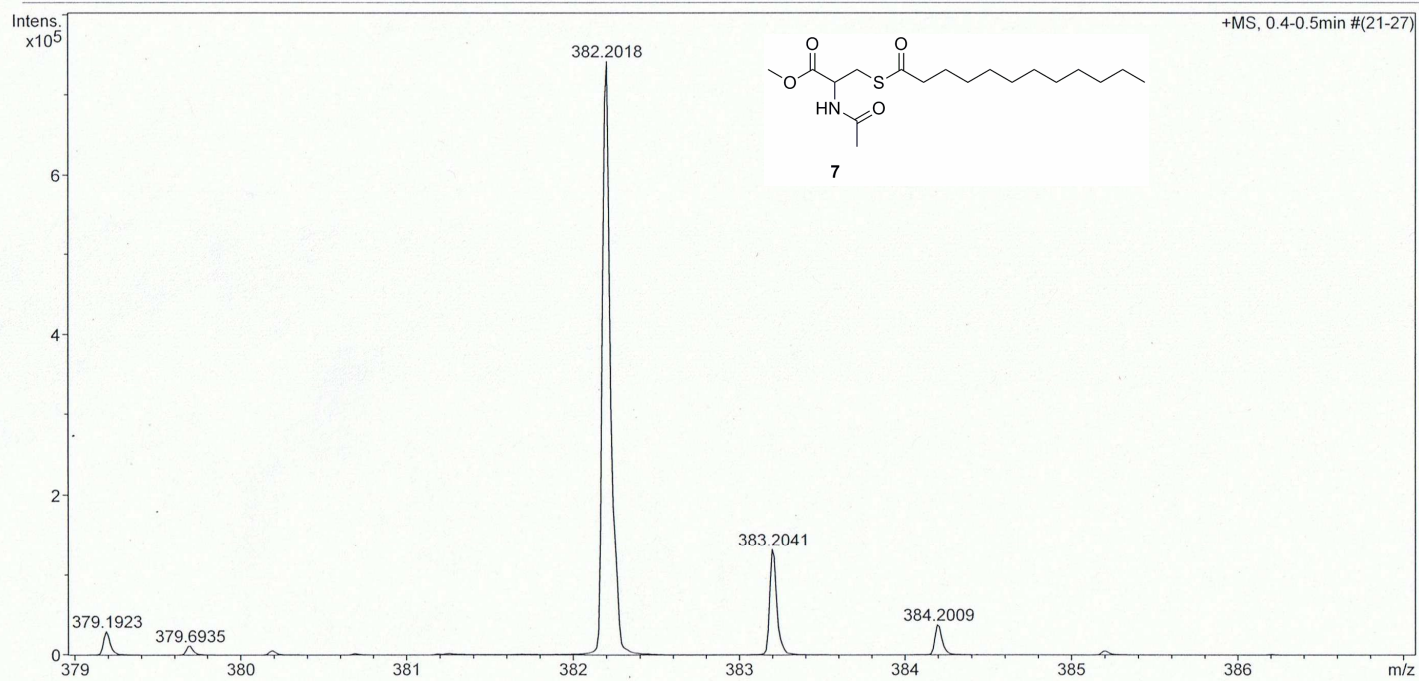

## HPLC analysis of methyl 2-acetamido-3-(dodecanoylthio)propanoate (7)

Purity was determined using an Agilent Technologies 1200 series HPLC system with a photodiode UV-visible detector; column: Eclipse XDB-C<sub>18</sub> 4.6 x 150mm 5 µm C<sub>18</sub>; mobile phase: methanol; injection volume: 20 µL; UV detection: 254 nm; flow rate: 1 mL/min.

Data File C:\CHEM32\1\DATA\EMMA HIGGINS\EAH05052010B 2010-05-05 14-10-25\043-0401.D  
Sample Name: EAH-12

```
=====
Acq. Operator   : Ian                               Seq. Line :    4
Acq. Instrument : Instrument 1                       Location  : Vial 43
Injection Date  : 5/5/2010 2:35:03 PM              Inj       :    1
                                                    Inj Volume: 20 µl
Acq. Method     : C:\Chem32\1\DATA\EMMA HIGGINS\EAH05052010B 2010-05-05 14-10-25\REV PHASE
                  METHANOL 20UL.M
Last changed    : 5/5/2010 2:09:53 PM by Ian
Analysis Method : C:\CHEM32\1\DATA\EMMA HIGGINS\EAH05052010B 2010-05-05 14-10-25\043-0401.D\
                  DA.M (REV PHASE METHANOL 20UL.M)
Last changed    : 5/5/2010 2:09:53 PM by Ian
                  (Current integration events modified)
Method Info     : Reverse Phase Methanol
=====
```

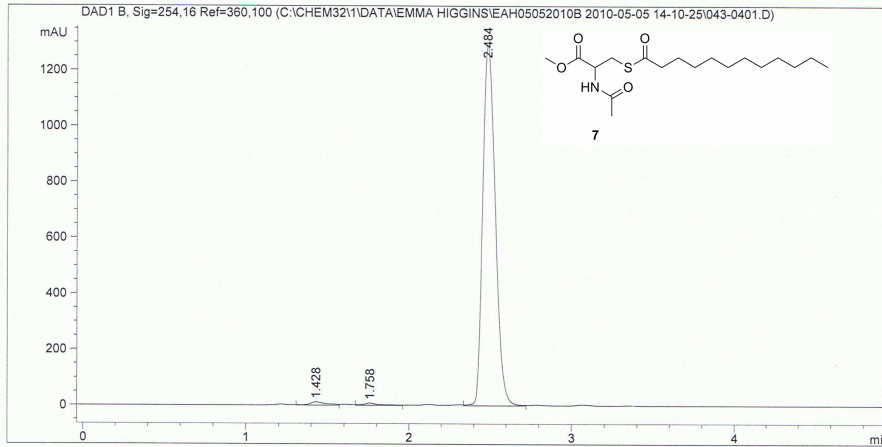

### Area Percent Report

```
Sorted By      : Signal
Multiplier     : 1.0000
Dilution       : 1.0000
Use Multiplier & Dilution Factor with ISTDs
```

Signal 1: DAD1 B, Sig=254,16 Ref=360,100

| Peak # | RetTime [min] | Type | Width [min] | Area [mAU*s] | Height [mAU] | Area %  |
|--------|---------------|------|-------------|--------------|--------------|---------|
| 1      | 1.428         | VV   | 0.0970      | 83.15818     | 11.97593     | 1.1704  |
| 2      | 1.758         | VB   | 0.0954      | 55.89657     | 8.01217      | 0.7867  |
| 3      | 2.484         | VV   | 0.0847      | 6965.81787   | 1295.59766   | 98.0428 |

Totals : 7104.87262 1315.58575

Instrument 1 5/25/2010 3:43:56 PM Ian

Page 1 of 2

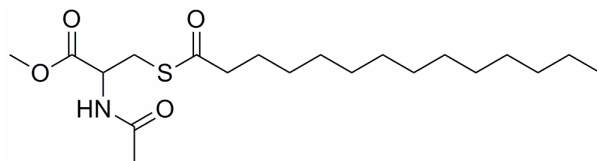

Methyl 2-acetamido-3-(tetradecanoylthio)propanoate **8**  
(500.1 MHz, DMSO-*d*<sub>6</sub>)

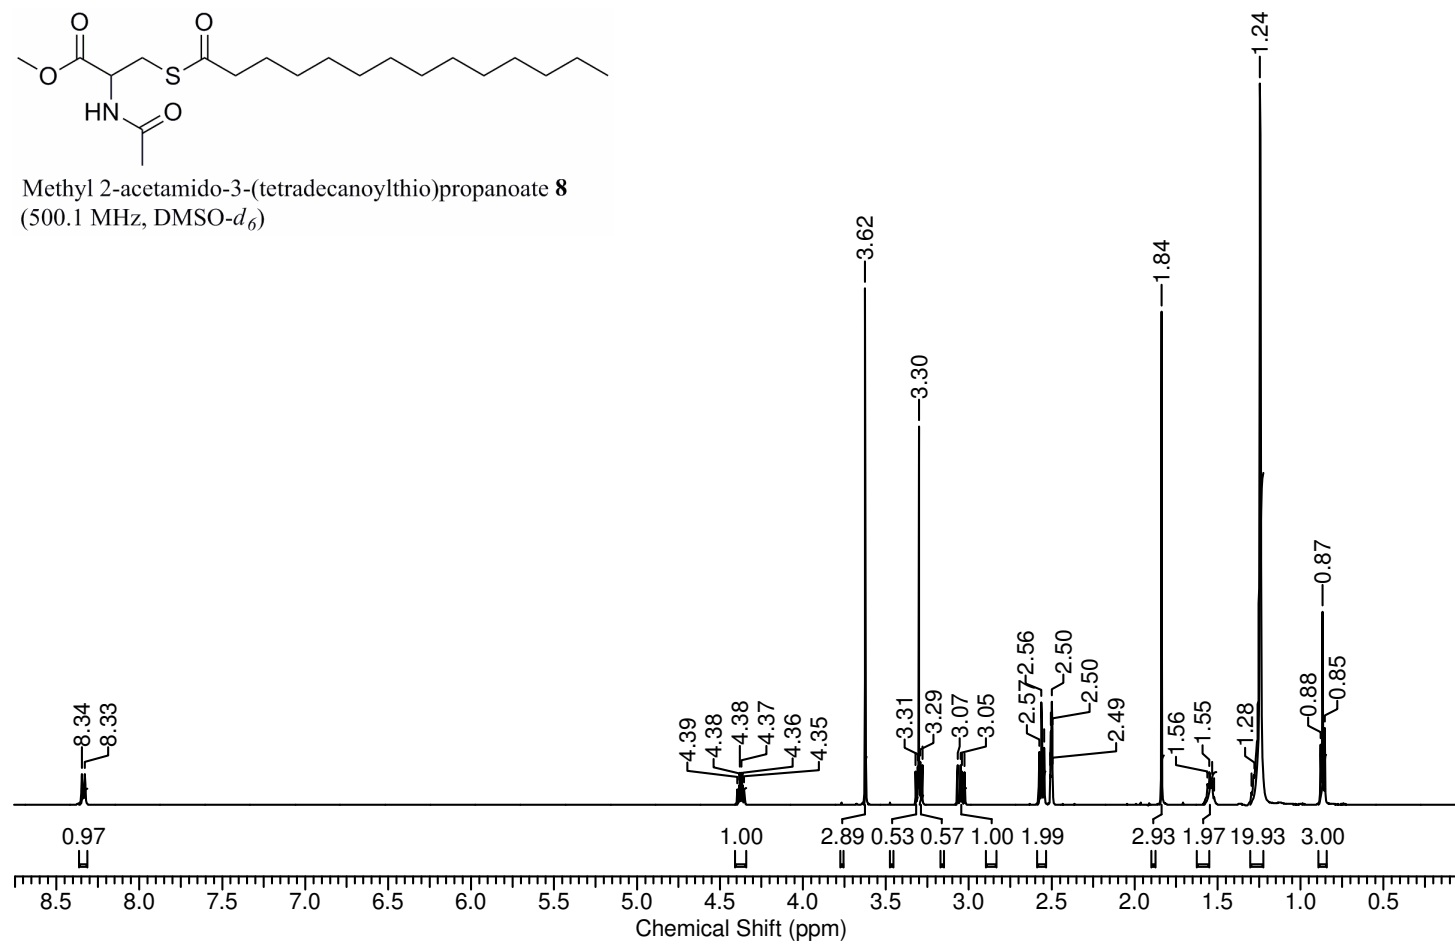

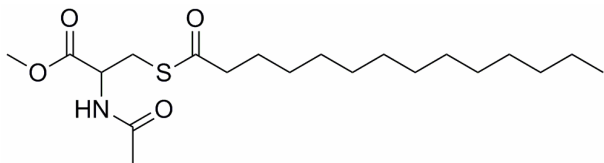

Methyl 2-acetamido-3-(tetradecanoylthio)propanoate **8**  
(125.8 MHz, DMSO- $d_6$ )

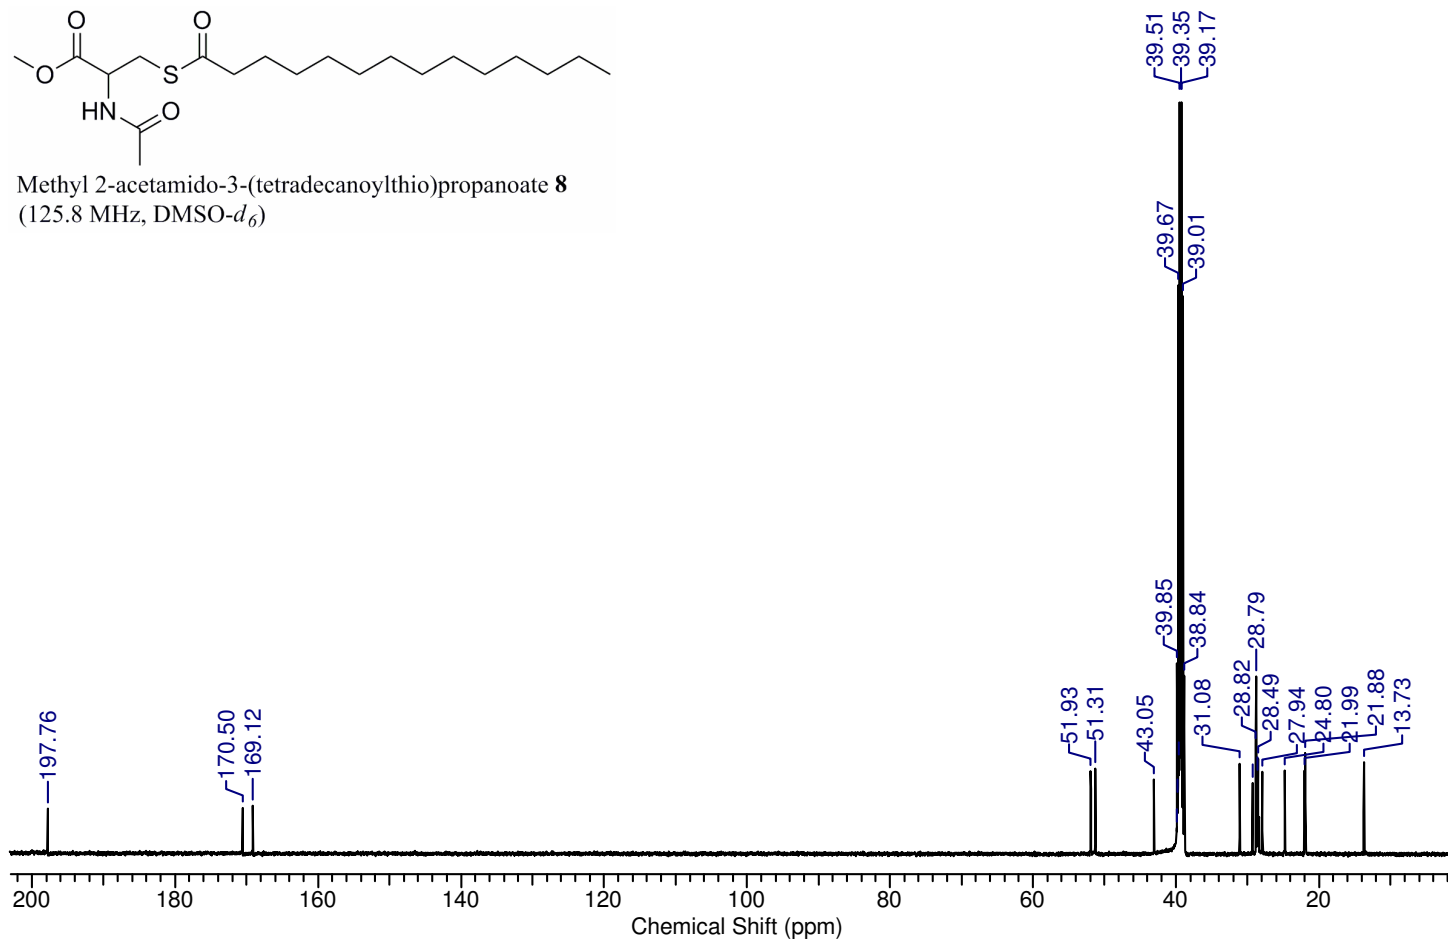

# Mass Spectrum Molecular Formula Report

## Analysis Info

Analysis Name D:\Data\Xiao\Oct 3 08000002.d  
Method xiaofengpos.m  
Sample Name rab-7  
Comment

Acquisition Date 10/3/2008 1:41:51 PM

Operator Administrator  
Instrument micrOTOF 57

## Acquisition Parameter

Source Type ESI  
Scan Range n/a  
Scan Begin 50 m/z  
Scan End 1500 m/z

Ion Polarity Positive  
Capillary Exit 150.0 V  
Hexapole RF 130.0 V  
Skimmer 1 55.0 V  
Hexapole 1 26.0 V

Set Corrector Fill 52 V  
Set Pulsar Pull 398 V  
Set Pulsar Push 398 V  
Set Reflector 1300 V  
Set Flight Tube 9000 V  
Set Detector TOF 1960 V

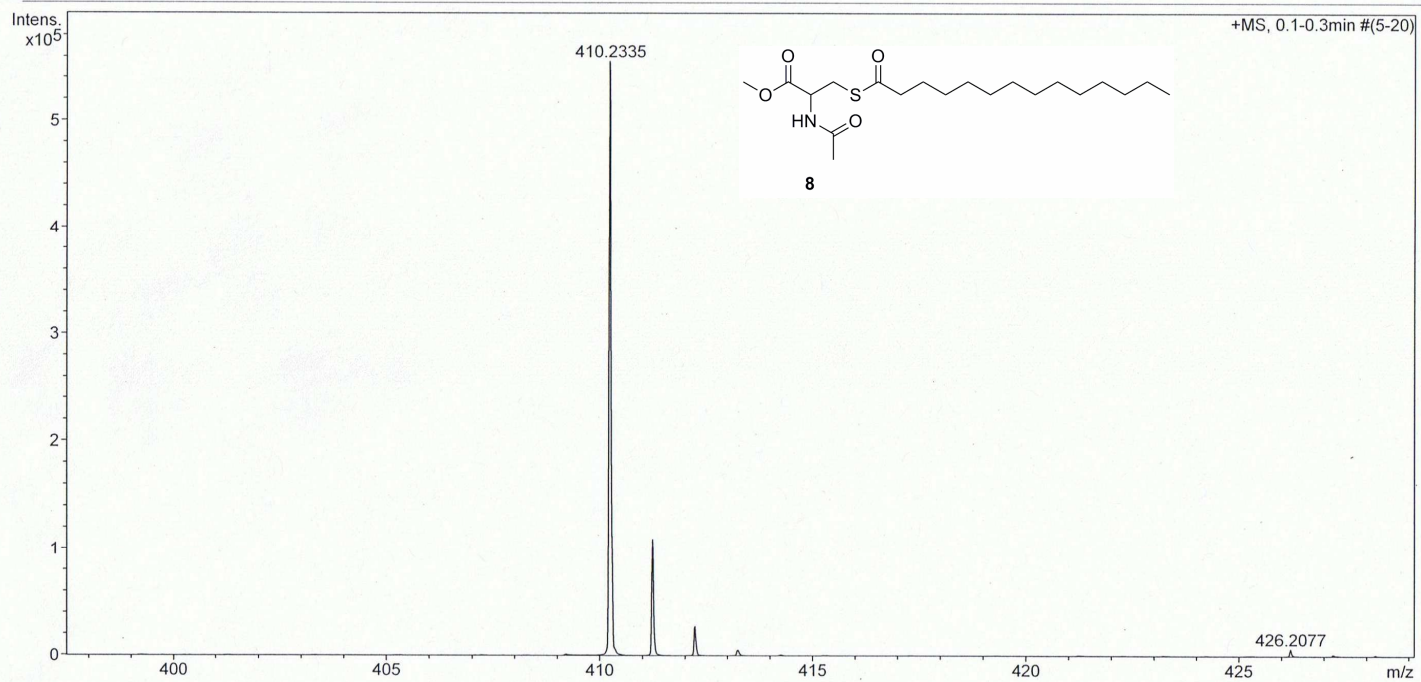

## HPLC analysis of methyl 2-acetamido-3-(tetradecanoylthio)propanoate (8)

Purity was determined using an Agilent Technologies 1200 series HPLC system with a photodiode UV-visible detector; column: Eclipse XDB-C18 4.6 x 150mm 5 µm C18; mobile phase: methanol; injection volume: 10 µL; UV detection: 254 nm; flow rate: 1 mL/min.

Data File C:\CHEM32\1\DATA\EMMA HIGGINS\EAH05082009A 2009-08-05 11-04-11\021-0101.D  
Sample Name: RAB-7

```
=====
Acq. Operator   : Ian                               Seq. Line :    1
Acq. Instrument : Instrument 1                       Location  : Vial 21
Injection Date  : 8/5/2009 11:05:37 AM              Inj       :    1
                                                    Inj Volume: 10 µl
Acq. Method     : C:\Chem32\1\DATA\EMMA HIGGINS\EAH05082009A 2009-08-05 11-04-11\REV PHASE
CH3CN 10UL.M
Last changed    : 8/5/2009 10:44:41 AM by Ian
Analysis Method : C:\CHEM32\1\DATA\EMMA HIGGINS\EAH05082009A 2009-08-05 11-04-11\021-0101.D\
DA.M (REV PHASE CH3CN 10UL.M)
Last changed    : 8/5/2009 10:44:41 AM by Ian
Method Info     : Reverse Phase Methanol
=====
```

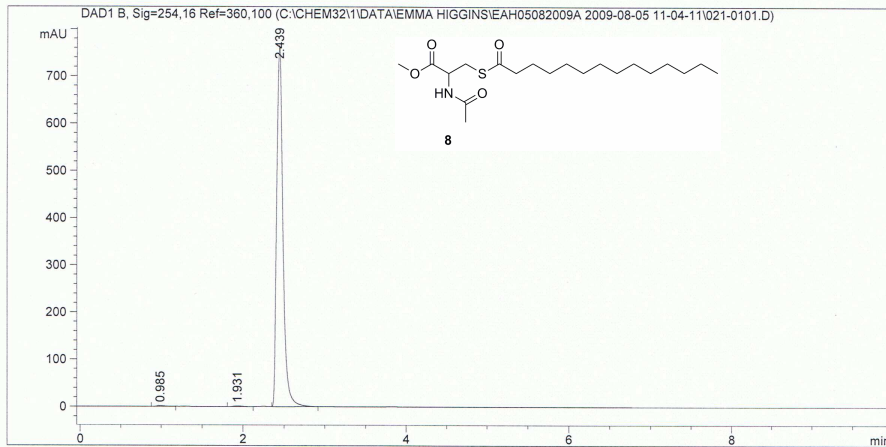

### Area Percent Report

```
Sorted By      : Signal
Multiplier     : 1.0000
Dilution       : 1.0000
Use Multiplier & Dilution Factor with ISTDs
```

Signal 1: DAD1 B, Sig=254,16 Ref=360,100

| Peak # | RetTime [min] | Type | Width [min] | Area [mAU*s] | Height [mAU] | Area %  |
|--------|---------------|------|-------------|--------------|--------------|---------|
| 1      | 0.985         | BB   | 0.1075      | 14.30312     | 1.82387      | 0.3507  |
| 2      | 1.931         | BB   | 0.1092      | 8.83584      | 1.26975      | 0.2166  |
| 3      | 2.439         | BB   | 0.0818      | 4055.52686   | 766.10217    | 99.4327 |

Totals : 4078.66582 769.19580

Instrument 1 5/25/2010 3:54:34 PM Ian

Page 1 of 2

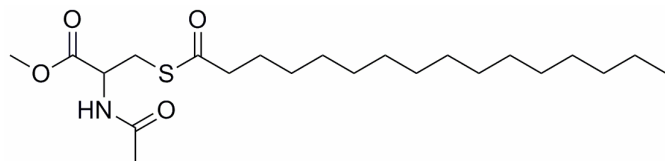

Methyl 2-acetamido-3-(palmitoylthio)propanoate **9**  
 (500.1 MHz,  $\text{CHCl}_3-d_3$ )

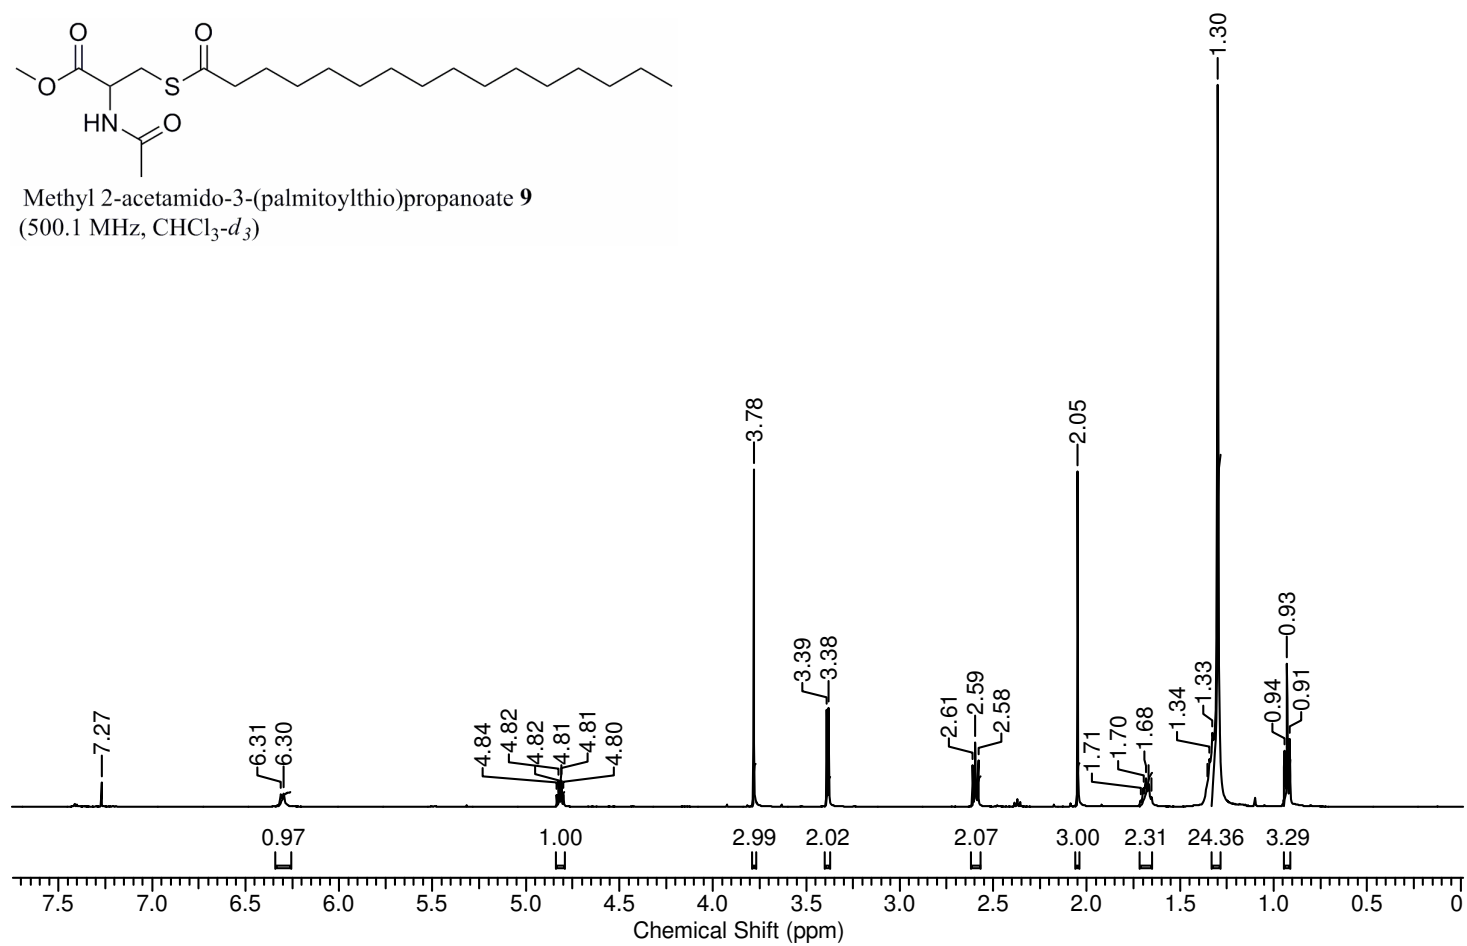

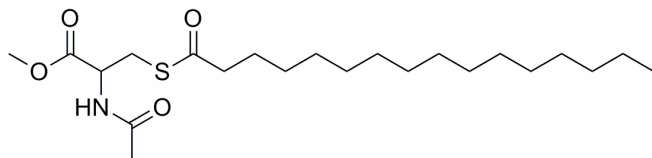

Methyl 2-acetamido-3-(palmitoylthio)propanoate **9**  
(125.8 MHz,  $\text{CHCl}_3-d_3$ )

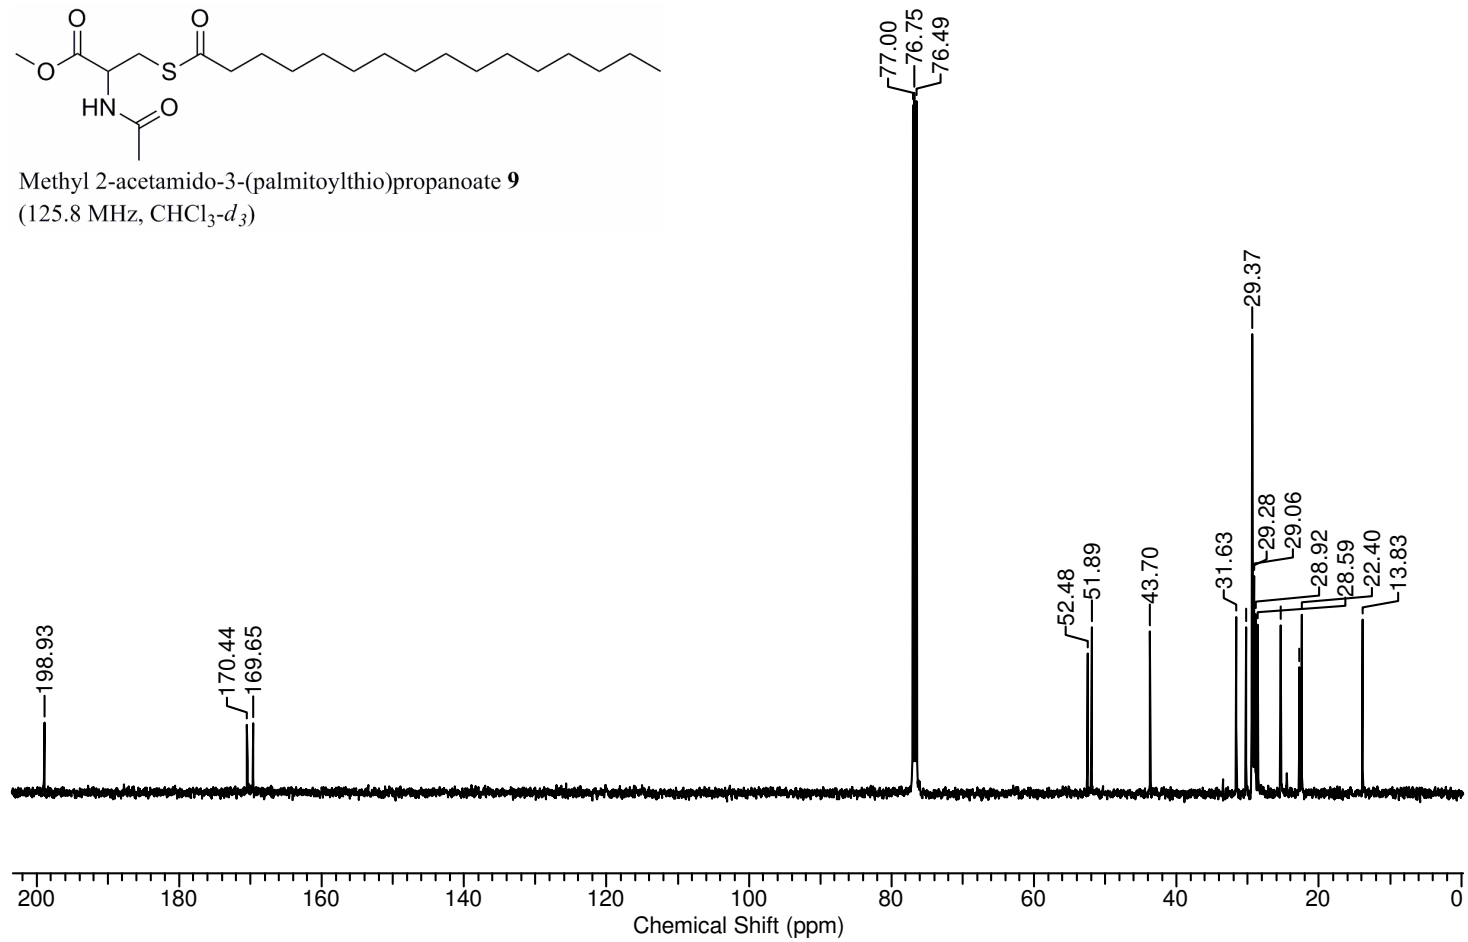



# Mass Spectrum Molecular Formula Report

## Analysis Info

Analysis Name D:\Data\Xiao\Jan 28 10000004.d  
Method xiaofengpos.m  
Sample Name EAH-3  
Comment

Acquisition Date

1/28/2010 1:57:37 PM

Operator

Administrator

Instrument

micrOTOF

57

## Acquisition Parameter

Source Type ESI  
Scan Range n/a  
Scan Begin 50 m/z  
Scan End 1500 m/z

Ion Polarity Positive  
Capillary Exit 100.0 V  
Hexapole RF 150.0 V  
Skimmer 1 55.0 V  
Hexapole 1 26.0 V

Set Corrector Fill 52 V  
Set Pulsar Pull 398 V  
Set Pulsar Push 398 V  
Set Reflector 1300 V  
Set Flight Tube 9000 V  
Set Detector TOF 1960 V

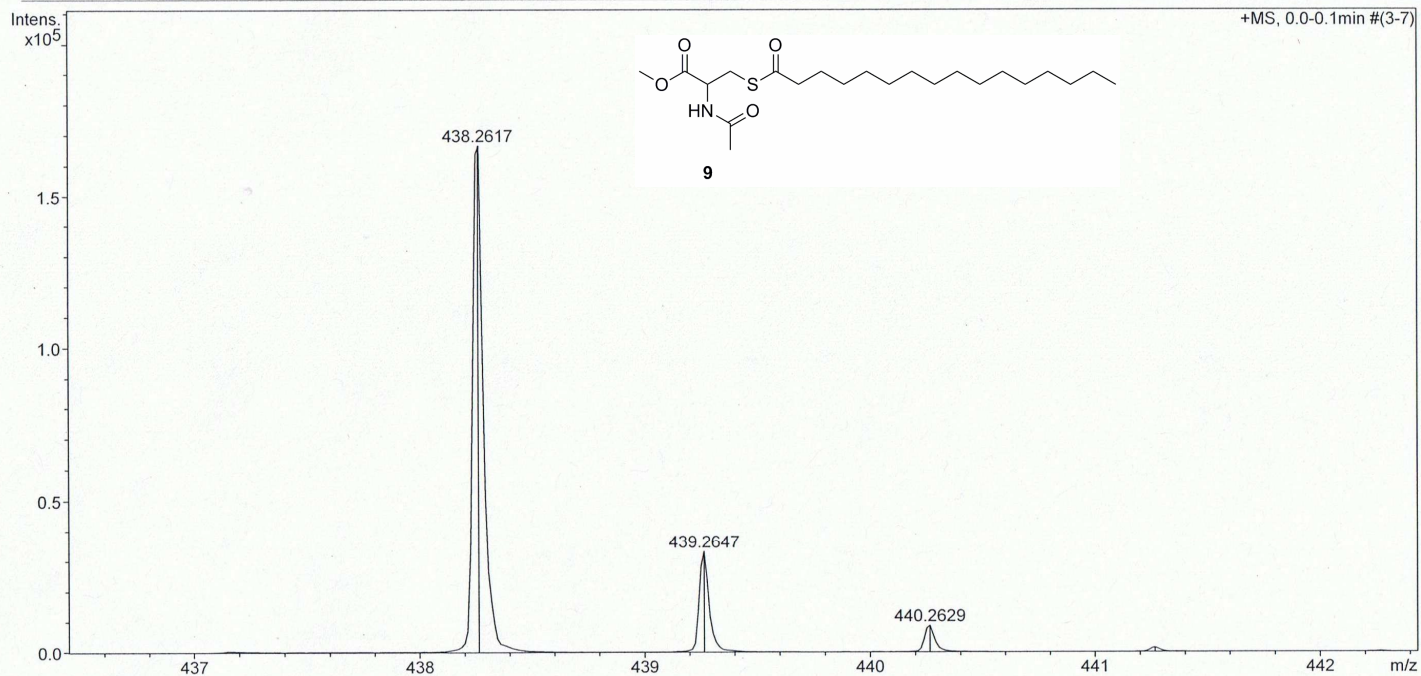

## HPLC analysis of methyl 2-acetamido-3-(palmitoylthio)propanoate (9)

Purity was determined using an Agilent Technologies 1200 series HPLC system with a photodiode UV-visible detector; column: Eclipse XDB-C18 4.6 x 150mm 5 µm C18; mobile phase: methanol; injection volume: 50 µL; UV detection: 254 nm; flow rate: 1 mL/min.

Data File C:\CHEM32\1\DATA\JEREMY\JER091008CFRACS 2008-10-09 15-09-59\EAH02062010B 2010-06-02 14-5  
Sample Name: EAH-3 frac

```
=====
Acq. Operator   : Ian                      Seq. Line :    2
Acq. Instrument : Instrument 1              Location  : Vial 32
Injection Date  : 6/2/2010 3:08:40 PM      Inj       :    1
                                           Inj Volume: 50 µl
Acq. Method    : C:\Chem32\1\DATA\JEREMY\JER091008CFRACS 2008-10-09 15-09-59\EAH02062010B
                                           2010-06-02 14-59-17\REV PHASE METHANOL 20UL.M
Last changed   : 6/2/2010 2:56:03 PM by Ian
Analysis Method : C:\CHEM32\1\DATA\JEREMY\JER091008CFRACS 2008-10-09 15-09-59\EAH02062010B
                                           2010-06-02 14-59-17\032-0201.D\DA.M (REV PHASE METHANOL 20UL.M)
Last changed   : 6/2/2010 3:16:03 PM by Ian
                                           (modified after loading)
Method Info    : Alzheimer project - ShutDown
=====
```

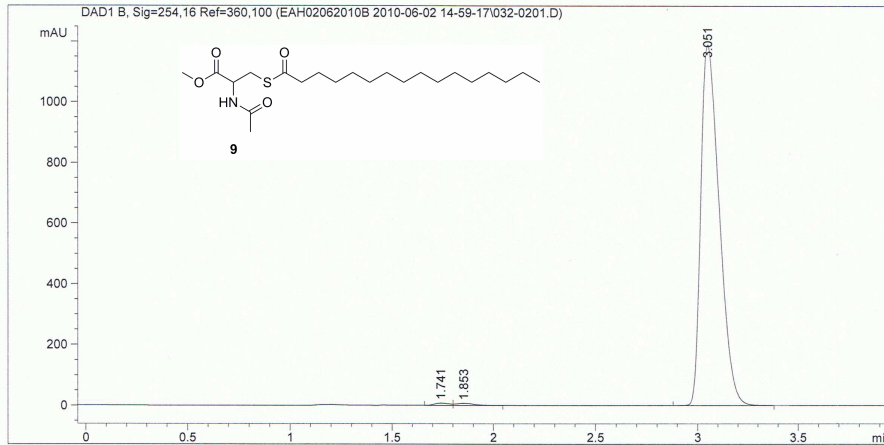

### Area Percent Report

```
=====
Sorted By      : Signal
Multiplier    : 1.0000
Dilution      : 1.0000
Use Multiplier & Dilution Factor with ISTDs
=====
```

Signal 1: DAD1 B, Sig=254,16 Ref=360,100

| Peak # | RetTime [min] | Type | Width [min] | Area [mAU*s] | Height [mAU] | Area %  |
|--------|---------------|------|-------------|--------------|--------------|---------|
| 1      | 1.741         | VV   | 0.0774      | 39.90322     | 7.83817      | 0.5230  |
| 2      | 1.853         | VB   | 0.1011      | 45.76357     | 6.92376      | 0.5998  |
| 3      | 3.051         | BB   | 0.0978      | 7544.26270   | 1192.38586   | 98.8772 |

Totals : 7629.92948 1207.14780

Instrument 1 6/2/2010 3:16:07 PM Ian

Page 1 of 2
